## **The transcription factor Shox2 shapes thalamocortical neuron firing and synaptic properties**

Diankun Yu<sup>1</sup>, Matthieu Maroteaux<sup>1</sup>, Yingnan Song<sup>2</sup>, Xiao Han<sup>1</sup>, Isabella Febbo<sup>1</sup>, Claire Namboodri<sup>1</sup>, Cheng Sun<sup>2</sup>, Wenduo Ye<sup>2</sup>, Emily Meyer<sup>1</sup>, Stuart Rowe<sup>1</sup>, YP Chen<sup>2</sup>, LA Schrader<sup>1,2</sup>

- 1. Neuroscience Program, Brain Institute, Tulane University**
- 2. Cell and Molecular Biology, Tulane University**

**Running Title:** Shox2 affects thalamocortical neuron function

Abstract: 260

Intro: 807

Results: 3063

Discussion: 905

Methods: 3003

Address for LAS:

Cell and Molecular Biology

2000 Percival Stern Hall

6400 Freret St.

New Orleans, LA 70118

**[schrader@tulane.edu](mailto:schrader@tulane.edu)**

## ABSTRACT

Thalamocortical neurons (TCNs) transmit information about sensory stimuli from the thalamus to the cortex. In response to different physiological states and demands TCNs can fire in tonic and/or phasic burst modes. These firing properties of TCNs are supported by precisely timed inhibitory synaptic inputs from the thalamic reticular nucleus and intrinsic currents, including T-type  $\text{Ca}^{2+}$  and HCN currents. These intrinsic currents are mediated by Cav3.1 and HCN channel subunits, and alterations in expression or modulation of these channels can have dramatic implications on thalamus function. The factors that regulate these currents controlling the firing patterns important for integration of the sensory stimuli and the consequences resulting from the disruption of these firing patterns are not well understood. *Shox2* is a transcription factor known to be important for pacemaker activity in the heart. We show here that *Shox2* is also expressed in adult mouse thalamus. We hypothesized that genes regulated by *Shox2*'s transcriptional activity may be important for physiological properties of TCNs. In this study, we used RNA sequencing on control and *Shox2* knockout mice to determine *Shox2*-affected genes and revealed a network of ion channel genes important for neuronal firing properties. Quantitative PCR confirmed that expression of *Hcn2*, *4* and *Cav3.1* genes were affected by *Shox2* KO. Western blotting showed expression of the proteins for these channels was decreased in the thalamus, and electrophysiological recordings showed that *Shox2* KO impacted the firing and synaptic properties of TCNs. Finally, behavioral studies revealed that *Shox2* expression in TCNs play a role in somatosensory function and object recognition memory. Overall, these results reveal *Shox2* as a transcription factor important for TCN firing properties and thalamic function.

## 1 INTRODUCTION

2 Processing of sensory information is mediated by precise circuitry that senses stimuli in  
3 the periphery and transforms the information through a network of synaptic connections to  
4 ultimately allow perception and cognitive processing of the surrounding world. Rhythmic  
5 oscillations of brain activity crucial to cognitive function emerge from neuronal network  
6 interactions that consist of reciprocal connections between the thalamus, the inhibitory  
7 thalamic reticular nucleus and the cortex<sup>1</sup>. Dysfunction of these oscillations caused by  
8 aberrant activity in the thalamic circuit is thought to play a role in many neuropathological  
9 conditions, including epilepsy<sup>2-4</sup>, autism<sup>5-7</sup>, and schizophrenia<sup>8-11</sup>. Furthermore, damage to  
10 thalamic nuclei, especially medial and anterior nuclei, causes severe memory deficits known  
11 as diencephalic amnesia<sup>12-17</sup>.

12 The intrinsic properties that shape action potential firing and contribute to rhythmic  
13 oscillations of the thalamocortical neurons (TCNs) are important for efficient transfer of  
14 information from the thalamus to the cortex. Notably, TCNs switch their firing states between  
15 2 modes, burst and tonic firing modes that occur at different membrane potentials<sup>18-20</sup>. The  
16 transitions between tonic and burst modes are controlled by several intrinsic conductances  
17 within the TCNs, mainly T-type  $\text{Ca}^{2+}$  currents ( $I_T$ ) and H-currents ( $I_h$ ), mediated by Cav3.x and  
18 HCN family of channels, respectively<sup>1</sup>. Interplay of the kinetics of these currents and other  
19 conductances, including leak  $\text{K}^+$ , inwardly rectifying  $\text{K}^+$ , a persistent Na current and transient  
20 A-type currents, can establish a cycle of oscillatory activity that generates rhythmic activity in  
21 the thalamocortical network<sup>21</sup>. Consequently, modulation of the intrinsic properties of TCNs  
22 is an important regulatory mechanism of firing activity crucial for sensory perception, sleep

23 activity and cognition. Very little is understood about the factors that contribute to  
24 modulation of the ion channels that underlie these currents.

25 The transcription factor, *Shox2*, represents a possible mechanism to coordinate  
26 expression of ion channels important for TCN firing properties. *Shox2* is a member of the  
27 homeobox family of transcription factors<sup>22-24</sup>, and recent studies suggest it is important for  
28 development and maintenance of rhythmic activity in adult heart. Cells in the sinoatrial node  
29 of the heart generate spontaneous, rhythmic action potentials and lead other working  
30 myocytes to beat at a stable firing rate, thus these cells are known as pacemaker cells<sup>25</sup>. The  
31 rhythmic action potential generation in the pacemaker cells is mediated by the prominent  
32 expression of HCN channels and T-type calcium channels<sup>26,27</sup>. We and others have shown that  
33 *Shox2* plays a decisive role in the differentiation of pacemaker cells in the sinoatrial node of  
34 the heart and pulmonary vein in mice, and *Shox2* expression in the SAN is necessary for  
35 cardiac pacemaker-type activity<sup>28,29</sup>. Importantly, *Shox2* is essential for expression of HCN4  
36 channels<sup>28</sup>, and *Shox2* overexpression favors differentiation of mouse embryonic stem cells  
37 into pacemaker cells with biological pacing ability and enhanced HCN currents<sup>30</sup>. *Shox2*  
38 expression in the sinoatrial node of the heart continues into adulthood since cells of the  
39 sinoatrial node maintain pacemaker properties, while *Shox2* expression is suppressed in  
40 pulmonary vein and coronary sinus in the adult, and these cells lose pacemaker properties  
41 during development<sup>31</sup>. These results suggest that *Shox2* expression is critical for expression of  
42 channels important for myocyte firing properties and is a determinant of pacemaker  
43 properties of the sinoatrial node.

44 During development of the nervous system, *Shox2* expression has been reported in  
45 neurons of the facial motor nucleus (nVII)<sup>32</sup>, cerebellum<sup>33</sup>, spinal cord<sup>34</sup> and dorsal root  
46 ganglia<sup>35</sup>. *Shox2*-expressing excitatory interneurons in the ventral spinal cord are rhythmically

47 active during locomotor-like activity, and synaptic and electrical connections between *Shox2*-  
48 expressing interneurons are crucial for the frequency and stability of their rhythmic activity<sup>34</sup>,  
49 <sup>36</sup>, showing that interconnectivity between *Shox2*-expressing neurons is critical for  
50 synchronization of rhythmic activity. These results suggest that *Shox2*-expressing neurons play  
51 a critical role in central pattern generation important for locomotion, but the role of *Shox2* in  
52 this rhythmic behavior was not further investigated.

53 In this study, we found that *Shox2* is expressed in thalamocortical neurons (TCNs) in adult  
54 mice. TCNs express HCN2, HCN4 and Ca<sub>v</sub>3.1 channel protein subunits that are important for  
55 firing properties of TCNs, and we hypothesized that *Shox2* coordinates the expression of genes  
56 for these ion channels to affect action potential firing activity of TCNs. Using conditional KO  
57 animals, we further demonstrated that *Shox2* is important for tonic spike frequency firing  
58 properties in TCNs, likely by affecting expression multiple ion channels, including HCN. We  
59 also demonstrated that an inducible global knock-out of *Shox2* reduced anxiety behavior in  
60 the open field, impaired sensorimotor function and object recognition memory. Object  
61 recognition memory deficits were confirmed with an inducible *Shox2* knock-out in medial  
62 thalamus. The present study provides novel insight into the molecular markers that contribute  
63 to thalamocortical neuron function and shows that *Shox2* expression is critical to maintain  
64 thalamic neuron function and physiological properties by regulating gene expression in the  
65 neurons of the adult mouse thalamus.

66

## 67 **Methods**

### 68 **Mice**

69 All animal procedures were approved by Tulane University Institutional Animal Care and  
70 Use Committee (IACUC) according to National Institutes of Health (NIH) guidelines. *Shox2*  
71 transgenic mice including *Shox2<sup>Cre</sup>*, *Shox2<sup>LacZ</sup>*, *Shox2<sup>ff/ff</sup>* and *Rosa26<sup>CreERT</sup>* mice were generously  
72 donated by Dr. Yiping Chen. All wildtype C57Bl/6N mice were ordered from Charles River.  
73 *Rosa26<sup>LacZ/+</sup>* (stock #003474) and *Gbx2<sup>CreERT/+</sup>* breeders (stock #022135) were ordered from  
74 Jackson Lab.

75 In inducible KO experiments, *Rosa26<sup>CreERT/+</sup>*, *Shox2<sup>ff/ff</sup>* or *Rosa26<sup>CreERT/CreERT</sup>*, *Shox2<sup>ff/ff</sup>* female  
76 mice were crossed with *Shox2<sup>-/+</sup>* male mice or, in the case of the *Gbx2* animals,  
77 *Gbx2<sup>CreERT/+</sup>*, *Shox<sup>ff/ff</sup>* or *Gbx2<sup>CreERT/CreERT</sup>*, *Shox<sup>ff/ff</sup>* were crossed with *Shox2<sup>-/+</sup>* male mice  
78 (Supplemental Fig. 1). Litters were labelled and genotyped at postnatal day 10 (P10). The KO  
79 group was the *Rosa26<sup>CreERT/+</sup>*, *Shox2<sup>-/ff</sup>* mice (*Gbx2<sup>CreERT/+</sup>*, *Shox2<sup>-/ff</sup>*) and the control (CR) group  
80 was the littermate *Rosa26<sup>CreERT/+</sup>* (*Gbx2<sup>CreERT/+</sup>*), *Shox2<sup>+/ff</sup>*. In the *Shox2<sup>LacZ/+</sup>* and *Shox2<sup>Cre/+</sup>* mice,  
81 the first two exons of the *Shox2* allele were partially replaced by *LacZ* and *Cre* genes  
82 respectively in order to obtain the expression of *LacZ* mRNA and *Cre* mRNA under the control  
83 of the *Shox2* promoter, while the unaffected alleles express *Shox2* mRNA<sup>24</sup>. The *Rosa26<sup>CreERT/+</sup>*  
84 mouse line is a transgenic mouse line with a tamoxifen-inducible Cre<sup>ERT</sup> inserted in the *Rosa26*  
85 loci. The *Rosa26<sup>LacZ/+</sup>* mouse line is a transgenic mouse line with a floxed stop signals followed  
86 by *LacZ* gene inserted in the *Rosa26* loci<sup>37</sup>. This ‘cre reporter’ mouse strain was used to test  
87 the expression of the *Cre* transgene under the regulation of a specific promoter.

88 The *Rosa26<sup>CreERT</sup>* is a global KO, whereas the *Gbx2<sup>CreERT</sup>* mouse was used to knockdown  
89 *Shox2* specifically in the medial thalamus. Our localization studies with *Gbx2*-promotor driven  
90 GFP staining showed that *Gbx2* promotor-driven *CreERT* is specifically expressed in the medial

91 thalamus of the  $Gbx2^{CreErt}$  adult mouse (Supplemental Fig. 2A). Further testing using RT-qPCR  
92 showed that *Shox2* mRNA was reduced in the medial thalamus of the  $Gbx2^{CreRt/+}$ ,  $Shox2^{-/f}$   
93 compared to CR mice, but not lateral thalamus (Supplemental Fig. 2B).

94 To induce recombination in animals bearing a  $Cre^{ERT2}$ , pre-warmed tamoxifen (100-160  
95 mg/kg) was injected intraperitoneally into KO mice and CR littermates at the same time every  
96 day for five consecutive days. Tamoxifen (20 mg/mL) was dissolved in sterile corn oil (Sigma,  
97 C8267) with 10% alcohol. The littermate KO mice and CR mice of the same sex were housed  
98 together and received the same handling. Throughout experiments, the researchers were  
99 blinded to the genotype. RT-qPCR experiments were used to confirm the efficiency of *Shox2*  
100 KO in brains in every animal tested.

101 In order to view projections of *Shox2*-expressing neurons, we created the *Ai27D-Shox2Cre*  
102 mouse. B6.Cg-Gt(ROSA)26Sortm27.1(CAG-COP4\*H134R/tdTomato)Hze/J(Ai27D) mice from  
103 Jackson labs were crossed with *Shox2Cre* to obtain mice with *Shox2*-expressing neurons  
104 labeled with tdTomato and expressing Chr2 (figure 2 M-O).

### 105 **X-gal staining**

106 Adult  $Shox2^{LacZ/+}$  or  $Shox2^{Cre/+}$ ,  $Rosa26^{LacZ/+}$  male mice were anaesthetized by isoflurane  
107 inhalation, decapitated, and the brains were removed. Brains were sliced at 200  $\mu$ m using a  
108 Vibratome Series 3000 Plus Tissue Sectioning system. Brain slices were placed into ice-cold  
109 artificial cerebrospinal fluid (aCSF) in a 24-well plate and fixed with 0.5% glutaraldehyde and  
110 4% paraformaldehyde in phosphate buffered saline (PBS) for 15 minutes. After 3X wash with  
111 ice-cold PBS, the slices were incubated with X-gal staining solution, containing: (X-gal (1mg/ml),  
112 potassium ferrocyanide (4 mM), potassium ferricyanide (4mM) and  $MgCl_2$ (2 mM) and covered  
113 by aluminum foil at 37 °C overnight. All slices were washed and post-fixed. Images were taken  
114 under a stereo microscope.

## 115 **Immunohistochemistry (IHC)**

116 Mice were deeply anaesthetized by injection with ketamine (80 mg/kg) mixed with  
117 xylazine (10 mg/kg), perfused transcardially with ice-cold phosphate-buffered saline (PBS)  
118 followed by 4% paraformaldehyde in PBS and decapitated for brain collection. Mouse brains  
119 were placed in 4% paraformaldehyde in PBS at 4° C overnight for post-fixation. In order to  
120 perform cryostat sections, the brains were sequentially placed in 15% and 30% sucrose in PBS  
121 solutions at 4 °C until saturation. The brain samples were embedded with optimal cutting  
122 temperature compound (OCT) and stored at -20 °C and cryo-sectioned in 20-50 µm coronal  
123 slices with Leica CM3050S cryostat. For IF staining, slices were washed with 50 mM Tris  
124 Buffered Saline with 0.025% Triton X-100 (TTBS) and blocked in 2% Bovine Serum Albumin  
125 (BSA) in TTBS for 2 hours at room temperature. Primary antibodies were diluted in blocking  
126 solutions and applied on slides overnight at 4°C. Fluorescence-conjugated secondary  
127 antibodies were diluted 1:1000 in blocking solutions and applied on slides for one hour at  
128 room temperature. 1:1000 DAPI was applied for 5 minutes at room temperature for nuclei  
129 staining and washed. The slices were mounted on slides with mounting media (Vector  
130 Laboratories, H-1000) and imaged under confocal microscope.

## 131 **mRNA Sequencing**

132 Thalamus mRNA was extracted from 3 KO mice and 3 CR mice and sent to *BGI Americas*  
133 *Corporation (Cambridge, MA, USA)* for RNA-seq quantification. Total RNA was isolated in  
134 tissue from the midline of the thalamus of P60 male *Gbx2<sup>CreERT/+</sup>, Shox2<sup>-/f</sup>* mice and control  
135 male littermates (*Gbx2<sup>CreERT/+</sup>, Shox2<sup>+/f</sup>*) with the same method used for RT-qPCR RNA  
136 extraction. Around 30 million single-end 50-bp reads by BGISEQ-500 Sequencing Platform per  
137 sample were aligned to the mm10/GRCm38 mouse reference genome using Salmon v0.10.2  
138 <sup>38</sup>. The count data from Salmon v0.10.2 was analyzed via DESeq2 v 1.22.2 <sup>39</sup> to identify genes



139 differently expressed (DEGs) between KO and CR and to calculate Fragments Per Kilobase  
140 Million (FPKMs). Genes with adjusted p value < 0.1 were defined as DEGs and were used for  
141 further gene ontology (GO) analysis through online DAVID Bioinformatics Resources <sup>40, 41</sup>.

#### 142 **Quantitative reverse transcription PCR (RT-qPCR)**

143 The whole thalamus was collected from adult mouse brains (*Rosa<sup>CreErt</sup>-Shox2* KO) and  
144 immediately stored in RNAlater™ RNA stabilization reagent (ThermoFisher Scientific,  
145 AM7021). RNA was extracted using RNeasy Mini Kit (Qiagen, 74104) following the standard  
146 protocol provided in the manual. The RNA concentration and quality were tested using  
147 Nanodrop Microvolume Spectrophotometers and Fluorometer as well as agarose gel  
148 investigation. Reverse transcription was conducted using iScript™ Reverse Transcription  
149 Supermix (Bio- Rad, 1708840). Quantitative PCR was conducted with iTaq™ Universal SYBR  
150 Green Supermix (Bio-rad, 1725121) in Bio-Rad CFX96 Touch™ PCR system. Data analysis was  
151 done with CFX Manager software. The expression of all the genes tested in the RT-qPCR  
152 experiments were normalized to the widely used housekeeping reference gene  $\beta$ -actin (*Actb*)  
153 and TATA-box binding protein (*Tbp*) <sup>42, 43</sup>. All primers were designed and tested, and conditions  
154 were optimized to have an efficiency between 95% and 105%. Both the melt curves and gel  
155 investigations were used to confirm the RT-qPCR products. The primer sequences of all tested  
156 genes including reference gene *Actb* and *Tbp* are listed in Table 1.

157 To confirm knock-down of *Shox2* in the *Gbx2<sup>CreERT/+</sup>* animals, adult *Gbx2<sup>CreERT/+</sup>; Shox2<sup>-f</sup>*  
158 male and female mice were anaesthetized by isoflurane inhalation followed decapitation. The  
159 brains were removed and a 1 mm thick slice through the thalamus was removed via razor  
160 blade, the location of cut is determined by Paxinos and Franklin Mouse Brain Atlas. Medial  
161 thalamus tissue is collected with 1mm stainless steel punching tool and lateral thalamus was  
162 separated via razor blade. The collected tissues were stored in 50  $\mu$ L RNA later solution and

163 stored in -80 freezer. To homogenize collected tissues, 350  $\mu$ L of RLT lysis buffer from Qiagen  
164 RNeasy Mini Kit is added to the tissue and homogenized with a pestle mortar. The  
165 homogenized tissues went through sonication with a Q55 sonicator (Qsonica) and then 350  
166  $\mu$ L cold, 70% EtoH was added to the sample. After this, the mixed solution is processed by  
167 series of spin and wash follow the instructions book from Qiagen RNeasy Mini Kit. Once RNAs  
168 are isolated from tissues, we applied qRT-PCR with Shox2 primer (Table 1) and normalized  
169 with GAPDH.

170  
171  
172

**Table 1. Sequences of RT-qPCR primers**

| Gene           | Forward Primer(5'->3')  | Reverse Primer (5'->3')  |
|----------------|-------------------------|--------------------------|
| <i>Shox2</i>   | CCGAGTACAGGTTTGGTTTC    | GGCATCCTTAAAGCACCTAC     |
| <i>actb</i>    | CTAGACTTCGAGCAGGAGAT    | GATGCCACAGGATTCCATAC     |
| <i>Tbp</i>     | CCGTGAATCTTGGCTGTAACTTG | GTTGTCCGTGGCTCTCTTATTCTC |
| <i>Hcn1</i>    | CTTCGTATCGTGAGGTTTAC    | GTCATAGGTCATGTGGAATATC   |
| <i>Hcn2</i>    | CTTTGAGACTGTGGCTATTG    | GCATTCTCCTGGTTGTTG       |
| <i>Hcn4</i>    | ATACTTATTGCCGCCTCTAC    | TGGAGTTCTTCTTGCCTATG     |
| <i>Cacna1g</i> | GACACCAGGAACATCACTAAC   | CACAAACAGGGACATCAGAG     |
| <i>Cacna1h</i> | TTTGGGAATATGTGCTCTTC    | TCTAGGTGGGTAGATGTCTTATC  |
| <i>Gapdh</i>   | GTCGGTGTGAACGGATTTG     | TAGACTCCACGACATACTCAGCA. |

173

#### 174 **Western Blot**

175 Thalamic tissues were collected from the adult mouse brains and immediately placed  
176 on dry ice and stored at -80 °C until use. The thalamus samples were lysed with RIPA lysis  
177 buffer (150 mM Sodium chloride, 1% Triton X-100, 0.5% sodium deoxycholate, 0.1% SDS, 50

178 mM Tris, pH 8.0) with fresh added Halt™ protease inhibitor cocktail (ThermoFisher Scientific,  
179 78430). Samples were centrifuged at 12,000 rpm at 4 °C for 20 minutes and the supernatant  
180 protein samples were collected. The protein concentration of the samples was determined  
181 using the Bio-Rad DC protein assay (Bio-Rad, 500-0116). Samples were normalized with the  
182 same lysis buffer, aliquoted and stored at -80°C until use. Before loading, 5X sample buffer  
183 (ThermoFisher Scientific, 39001) and dithiothreitol (final concentration - 50 mM, DTT) were  
184 added to each protein sample. Sample mixtures were left at room temperature for 30 minutes.  
185 Protein (20-30 µg/well) was loaded in a SDS-PAGE gel (4% stacking gel and 8% separating gel),  
186 together with 3 µL prestained protein ladder (ThermoFisher Scientific, 26619). The gels were  
187 run at 70 mV for 3 hours, and the proteins were transferred to a pre-activated PVDF  
188 membrane (Millipore, IPFL00005) at -70 mV for 3 to 4 hours. Sodium dodecyl sulfate (SDS)  
189 and methanol were added into transfer buffer at a final concentration of 0.1% and 10%,  
190 respectively. The gels were stained with Coomassie Brilliant Blue solution (0.1% Coomassie  
191 Brilliant Blue, 50% methanol, 10% Glacial acetic acid) to check that no obvious proteins  
192 remained under these transfer conditions. Membranes were incubated in blocking solution  
193 with 5% non-fat dry milk and 3% BSA in TTBS at room temperature for one hour. Primary  
194 antibody was diluted in Odyssey<sup>R</sup> Blocking Buffer in TBS and applied on the membrane at 4 °C  
195 overnight. After washing the membrane with TTBS, fluorescence-conjugated secondary  
196 antibodies were diluted and applied on the membrane at room temperature for one hour.  
197 Imaging of the stained membrane was done in an Odyssey CLx Infrared Scanner and analyzed  
198 by Image Studio Lite Ver 5.2.

199

200

201

202 **Antibodies used in IHC and Western blot experiment**

| Reagent/Resource                       | Supplier          | Details                 |
|----------------------------------------|-------------------|-------------------------|
| Chicken anti- $\beta$ -galactosidase   | Abcam             | Ab9361; 1:500           |
| Rabbit anti-NeuN Cy3- conjugated       | Millipore Sigma   | ABN78; 1:500            |
| Mouse anti-parvalbumin                 | Millipore Sigma   | MAB1572; 1:500          |
| Rabbit-anti GFAP                       | PhosphoSolutions  | 620-GFAP; 1:300         |
| Rabbit-anti GFP                        | Novus Biologicals | NB 600-308; 1:300       |
| Alexa-Fluor 488 Goat anti-mouse        | Life Technologies | 1:1000                  |
| Alexa-Fluor 647 Goat anti-chicken      | Life Technologies | 1:1000                  |
| Alexa-Fluor 594 Goat anti-rabbit       | Life Technologies | 1:1000                  |
| mouse anti-HCN2                        | Neuromab          | N71/37; 1:1000          |
| mouse anti-HCN4                        | Neuromab          | N114/10; 1:1000         |
| mouse anti-Cav3.1                      | Neuromab          | N178A/9; 1:1000         |
| IRDye 680RD Goat anti-mouse            | Li-Cor            | P/N 926-68070; 1:10,000 |
| IRDye 800CW Goat anti-rabbit IgG (H+L) | Li-Cor            | P/N 926-32211; 1:10,000 |

203

204 **Electrophysiology**

205 At the same time of the day (11:00 am summer and 10:00 am winter), male and female  
206 mice (PND 60-120) were anaesthetized with isoflurane and decapitated. Brains were quickly  
207 removed and immersed in oxygenated (95% O<sub>2</sub> and 5% CO<sub>2</sub>), ice-cold N-methyl-D-glucamine  
208 (NMDG)-based slicing solution (in mM, 110 NMDG, 110 HCl, 3 KCl, 1.1 NaH<sub>2</sub>PO<sub>4</sub>, 25 NaHCO<sub>3</sub>,  
209 25 Glucose, 10 ascorbic acid, 3 pyruvic acid, 10 MgSO<sub>4</sub>, 0.5 CaCl<sub>2</sub>). The first 350  $\mu$ m coronal  
210 brain section containing the most anterior paraventricular thalamus (PVA) was obtained with  
211 a Vibratome Series 3000 Plus Tissue Sectioning System. The collected brain slices were  
212 transferred and incubated in oxygenated standard aCSF (in mM, 125 NaCl, 2.5 KCl, 26 NaHCO<sub>3</sub>,

213 1.24 NaH<sub>2</sub>PO<sub>4</sub>, 25 Dextrose, 2 MgSO<sub>4</sub>, 2 CaCl<sub>2</sub>) at 37 °C for 30 minutes, then incubated at room  
214 temperature until use.

215 During the recordings, an individual slice was transferred to a recording chamber and  
216 perfused with oxygenated external solution at a speed of 1 mL/minute at room temperature  
217 at room temperature. Unless otherwise specified, standard aCSF was perfused as the external  
218 solution. For isolation of the specific currents, different pharmacological antagonists were  
219 applied in the external solution as stated in the results. PVA was identified as the nucleus near  
220 the border of the third ventricle enclosed by the stria medullaris. Cell-attached and whole-cell  
221 recordings were obtained using MultiClamp 700B amplifier, Digidata 1322A digitizer, and a PC  
222 running Clampex 10.3 software (Molecular Device). For cell-attached recording, glass pipettes  
223 had resistances of 2.5 – 3.5 MΩ filled with standard aCSF. Giga seals were obtained in every  
224 cell by application of a small negative pressure for spontaneous action potential recording.  
225 For intracellular whole-cell patch clamp recording, glass pipettes had resistances of 3.5 – 6  
226 MΩ filled with internal pipette solution (in mM, 120 Kgluconate, 20 KCl, 0.2 EGTA, 10 Hepes,  
227 4 NaCl, 4 Mg<sup>2+</sup>ATP, 14 phosphocreatine, 0.3 Tris GTP (pH was adjusted to 7.2-7.25 by KOH,  
228 osmolarity was adjusted to 305-315 mOsm by sorbitol). Series resistance was monitored and  
229 only cells with series resistance less than 20 MΩ and that did not change over 15% throughout  
230 the recording were further analyzed. Spontaneous action potentials were recorded in current  
231 clamp mode at membrane potential. Cells with no action potentials identified in 5 minutes  
232 are classified as 'not active' cells. Action potential threshold was measured on the first spike  
233 at the point where the voltage change reaches 20 mV/ms.

234 HCN currents were isolated under voltage-clamp. The external solution for HCN current  
235 isolation contained 0.5 μM TTX, 1 mM NiCl<sub>2</sub>, 1 mM CdCl<sub>2</sub>, 2 mM BaCl<sub>2</sub>, 10 μM DNQX and APV  
236 to block voltage-gated sodium channels, voltage-gated calcium channels, inwardly-rectifying

237 potassium channels and excitatory synaptic current respectively.  $\text{NaH}_2\text{PO}_4$  was omitted to  
238 prevent precipitation with cations.

### 239 **Behavioral assays**

240 If a timeline is needed, P21-P25 tamoxifen injection; ~around P56 1-2 weeks handling; then 3  
241 day habituation of the room, 1 day open field, 2 days NOR, 1 weeks later paw sensation, 1  
242 weeks later forced swim, at least 1 weeks later tail suspension. 3 days handling before each  
243 test.

244 An open field test was used to test mouse exploratory behavior and anxiety-related  
245 behavior. The experiments were all done 2 hours into the animal's dark light phase under dim  
246 red light. All mice received routine handling for a week. Three days before the experiments,  
247 mice were habituated to the training and testing room for 1 hour each day. On the first day of  
248 experiments, each mouse was placed in the open field (16 inches x 16 inches) and allowed to  
249 explore freely under dim red light for 5 minutes. Infrared beams and computer-based software  
250 *Fusion* were used to track mice and calculate mice activity and time spent in the center (8  
251 inches x 8 inches) of total open field.

252 In novel object recognition (NOR) experiments, all mice received routine handling and  
253 three days habituation to the experimental room before the experiments. On the day before  
254 the familiarization trial, each mouse was placed in the open field in the absence of objects  
255 and allowed to explore it freely, the behaviors were recorded and analyzed further as open  
256 field test data. In the familiarization trial, each mouse was placed in the open field containing  
257 two identical 100 ml beakers in the neighboring corners for 5 minutes. Twenty-four hours later,  
258 each mouse was placed back in the same open field with two objects, one of which was the  
259 100 ml beaker and the other one a padlock of a similar dimension, for a 5-minute testing trial.  
260 To prevent bias in objects exploration, mice were always released on the opposite side from

261 the object for both familiarization and testing trials. For NOR and the subsequent behavior  
262 experiments, mouse behaviors in the testing trials were video-taped and analyzed by  
263 experimenters who were blind to the genotypes of the mice. Exploration of an object was  
264 defined as sniffing and touching the object with attention, whereas other behaviors like  
265 running around the object, sitting or climbing on it were not recorded as exploration <sup>48</sup>.  
266 Discrimination index was calculated as  $(t_n - t_f)/(t_n + t_f)$ . Where  $t_n$  = time exploring new object  
267 and  $t_f$  = time exploring familiar object. In the *Gbx2Cre,Shox2* KO test, 2 animals exhibited a  
268 preference for one object in the familiarization trial and therefore were not tested the next  
269 day.

270 The adhesive removal test was used to assess mouse paw sensorimotor response <sup>49</sup>. A  
271 small piece of round sticky paper tape (Tough-spots, for microtube cap ID, ~1 cm<sup>2</sup>, Research  
272 Products International Corp. 247129Y) was applied to the plantar surface of the right hind paw  
273 of each mouse, and the mouse was placed back in its home cage and the behavior recorded.  
274 The latency to the first response to the tape was measured and analyzed.

275 The tail suspension test and forced swim test were applied to assess and evaluate  
276 mouse depressive-like behaviors <sup>50</sup>. In the tail suspension test, a 5-cm of the tip of Falcon 15  
277 mL conical centrifuge tube was placed around the tails to prevent tail climbing, and each  
278 mouse was suspended by the tail for 5 minutes. The behavior of the mice was recorded and  
279 analyzed. The escape-related struggling time within the 5-minute experiment was measured  
280 as mobility time.

281 In the forced swim test, each mouse was placed in a 1000 ml beaker with ~800 ml water  
282 for 5 minutes. The behavior of the mouse was taped and analyzed by experimenters who were  
283 blinded to genotypes of the mice. Swimming and intentional movements with all four legs or

284 body were measured as mobility time, and small movements of front or hind legs made by  
285 the animal to stay at the surface were not counted as mobility.

286 Fear Conditioning: Fear conditioning (habituation, training and testing) was performed  
287 and filmed in standard operant chambers (Med Associates, video fear conditioning). All  
288 behaviors were recorded, and mobility or freezing behavior was assessed online by Medical  
289 Associates Video Freeze software.

290 The fear conditioning protocol occurred over 4 days as follows:

291 Day 1: Habituation - each animal was placed in the operant chamber for 10 minutes.

292 Day 2: Training - each animal was placed in the chamber for a total of 8 minutes. The  
293 training trial was two mild training sessions consisting of a 30 sec auditory cue (administered  
294 at 3 and 5 minutes after placement in chamber) that co-terminated with a single 2 second 0.5  
295 mA shock. The animal was removed from the chamber after 8 minutes.

296 Day 3: Context Testing: Animal was placed in the chamber for 5 minutes and behaviors  
297 recorded.

298 Day 4: Cued testing - the chamber was modified (plastic floor and inserts to allow  
299 different shape), and different olfactory cues (vanilla) were given. The cue was administered  
300 after 3 minutes chamber exploration and freezing to the cue was assessed as described above.  
301 Animals were removed from the chamber after 6 minutes.

## 302 **Statistics**

303 Unless otherwise noted in the text, control and KO results were compared using a  
304 Student's unpaired t-test. In some cases of unequal variance, the Mann Whitney  
305 nonparametric test is used instead of t-test.

306

307



308 **Results**

309 ***Shox2* is specifically expressed in the thalamic neurons in the brain of young adult mouse.**

310 To investigate the expression of *Shox2* in postnatal mouse brain, coronal brain slices from  
311 P25 and P60 *Shox2<sup>LacZ/+</sup>* mice were stained with X-gal, in which the expression of *LacZ* indicated  
312 *Shox2* expression (Supplemental Fig. 3 A, B). The X-gal staining results indicated that *Shox2* is  
313 expressed throughout the dorsal thalamus including medial thalamus, anterior thalamus  
314 nuclei (ATN), ventrobasal nucleus (VB), dorsal lateral geniculate nucleus (dLGN), and medial  
315 lateral geniculate nucleus (MGN) but not in other regions of diencephalon including habenula,  
316 reticular nucleus of the thalamus and hypothalamus, or other regions of the nervous system  
317 like the cortex, subcortical regions of the forebrain, hippocampus, amygdala, cerebellum and  
318 spinal cord. To determine whether the expression pattern of *Shox2* changes during  
319 development, coronal brain slices from a P56 *Shox2<sup>Cre/+</sup>, Rosa26<sup>LacZ/+</sup>* mouse in which *LacZ* is  
320 expressed in all cells that have expressed *Shox2* at any time during development were stained  
321 with X-gal (Supplemental Fig. 3C). These results showed that the expression of *Shox2* is  
322 relatively restricted to the dorsal thalamus in the adult as well as during development, with  
323 sparse expression extended to habenula and superior and inferior colliculus and nuclei within  
324 the brainstem in the developing animal. We further assessed the cell type of *Shox2*-expressing  
325 cells.

326 In order to determine the cell types in which *Shox2* is expressed, thalamic neurons were  
327 labeled with the neuronal nuclear protein antibody (NeuN) which is specifically expressed in  
328 mature neurons<sup>51, 52</sup>. *Shox2* was co-expressed in most, but not all, NeuN-positive cells  
329 throughout the dorsal thalamus from rostral to caudal (Fig. 1 A-C). Importantly, all *Shox2*-  
330 labeled cells were NeuN-positive, suggesting that *Shox2* expression is restricted to neurons.  
331 To confirm that *Shox2* was not expressed in astrocytes, the co-expression of *Shox2* and Glial

332 Fibrillary Acidic Protein (GFAP), which labels astrocytes<sup>53, 54</sup> was assessed. GFAP was  
333 expressed at relatively low levels in the thalamus but highly expressed in the hippocampus  
334 (supplemental Fig. 4), and *Shox2* was not expressed in the GFAP-positive astrocytes  
335 throughout the thalamus (Fig. 1D-F). Together these results show that *Shox2* is expressed in  
336 neurons and not GFAP-positive astrocytes.

337 To determine if *Shox2* is expressed in GABAergic neurons, immunohistochemistry (IHC)  
338 with parvalbumin (PV) on coronal brain sections from *Shox2*<sup>Cre/+</sup>, *Rosa26*<sup>LacZ/+</sup> mice was  
339 performed (Fig. 2). Parvalbumin (PV) is highly expressed in the interneurons of the reticular  
340 nucleus of thalamus, which borders the thalamus laterally and ventrally. PV labeling  
341 delineated the reticular nucleus that defined the border of the thalamus. The PV staining  
342 results confirmed the results shown in supplemental figure 4 that during development, *Shox2*  
343 is expressed throughout the thalamus (Fig. 2) and sparsely in the habenula (Fig. 2D) and  
344 midbrain (Fig. 2I). Importantly, *Shox2* was not expressed at any point during development in  
345 cells of the cortex (Fig. 2C), reticular nucleus of the thalamus (Fig. 2E, F), hypothalamus (Fig.  
346 2G) or hippocampus (Fig. 2I). In addition, our results showed few PV+ cells in the thalamus as  
347 previously reported<sup>55</sup>, and *Shox2* was not co-expressed in PV+ cells (Fig. 2G). These results  
348 suggest that *Shox2* is not expressed in parvalbumin-expressing inhibitory interneurons.

349 Finally, the expression and projections of *Shox2*-expressing neurons were investigated  
350 using *Shox2*<sup>Cre/+</sup>; *Rosa*<sup>tdTomato-ChR2</sup> mice. These mice allow labeling of *Shox2*-expressing neurons  
351 with td-Tomato and manipulation of *Shox2*-expressing neurons with Channelrhodopsin-2.  
352 Interestingly, we found that the *Shox2*-expressing neurons projected to multiple cortical areas,  
353 including retrosplenial and somatosensory cortices with a clear delineation of the barrel fields  
354 in somatosensory cortex (Fig. 2M-O). Further strong projections from *Shox2*-expressing  
355 neurons were observed within the thalamus, particularly the VB complex, in reticular nucleus

356 of thalamus and internal capsule (Fig. 2 M-O) projecting to somatosensory cortex. In summary,  
357 the X-gal staining and immunofluorescence results indicated that *Shox2* expression was  
358 restricted to excitatory thalamocortical neurons in the adult stage.

359

### 360 ***Lack of Shox2 affects gene expression in TCNs***

361 To study the specific role of *Shox2* in regulation of gene expression in neurons of adult  
362 thalamus, RNA sequencing was performed. For this experiment, the inducible knockout (KO,  
363  $n = 3$ ) of *Shox2* in *Gbx2*<sup>CreERT/+</sup>, *Shox2*<sup>-/-</sup> mice were compared to littermate *Gbx2*<sup>CreERT/+</sup>, *Shox2*<sup>+/-</sup>  
364 control (CR,  $n = 3$ ) mice. Our GFP staining results showed *Gbx2* is specifically expressed in the  
365 medial thalamus from P21 (Supplemental fig. 2), so we ran mRNA sequencing with RNA  
366 extracted from medial thalamus of the CR and KO mice. Our results showed 372 differentially  
367 expressed genes (DEG) between CR and KO mice, 212 of which are downregulated and 160  
368 are upregulated in KO tissue (Supplemental file and Fig. 3A). Gene Ontology (GO) analysis  
369 showed *Shox2* KO affected genes in GO terms of ion channel activity, learning and locomotory  
370 behavior (Fig. 3B). Importantly, *Shox2* KO downregulated the expression of *Hcn2*, *Hcn4* and  
371 *Cacna1g* genes (Supplemental file and Fig. 3A). The protein products of these genes, HCN2,  
372 HCN4 and Cav3.1 mediate HCN current and T-type Ca<sup>2+</sup> currents, respectively. Since these  
373 channels are significant contributors to the rhythmic firing properties of TCNs, we further  
374 pursued mRNA and protein expression of these channels.

375 To confirm *Shox2* regulates ion channel-related genes in the whole thalamus, another  
376 transgenic mouse line, the global KO (*Rosa26*<sup>CreERT/+</sup>, *Shox2*<sup>-/-</sup> mice), in which *Shox2* was  
377 reduced in the whole thalamus was used. The RNA was extracted from KO (*Rosa26*<sup>CreERT/+</sup>,  
378 *Shox2*<sup>-/-</sup> mice) and CR (*Rosa26*<sup>CreERT/+</sup>, *Shox2*<sup>f/+</sup>) mice, and RT-qPCR was performed. The Cav3  
379 family of Ca<sup>2+</sup> channel subunits encode I<sub>T</sub> and is highly expressed in the nuclei of the thalamus

380 <sup>56, 57</sup>. We tested the levels of mRNA expression for Cav3.1 and Cav3.2, which are coded by  
381 *Cacna1g* and *Cacna1h*, respectively. Previous studies showed that Cav3.1 protein subunits are  
382 the primary T-type calcium channel proteins expressed in the thalamocortical neurons, while  
383 Cav3.2 proteins are expressed at lower levels in the thalamus and the prominent subunit in  
384 the reticular nucleus of the thalamus <sup>58-61</sup>. Our results showed that expression of *Cacna1h*  
385 expression was very low in the thalamus, which confirmed the specificity of our thalamic  
386 dissection (Supplemental Fig. 2C) and there was no significant difference in *Cacna1h*  
387 expression between CR and KO (Student's t-test,  $t_9=1.02$ ,  $P=0.34$ ). With respect to the  
388 expression of *Cacna1g*, *Shox2* KO significantly decreased the mRNA expression of *Cacna1g*  
389 (Fig. 3C; Student's t-test,  $t_9=3.85$ ,  $P<0.01$ ) in the thalamic tissue. These results confirmed the  
390 mRNA sequencing data and suggest Cav3.1 channels that contribute to the T-type currents  
391 are down-regulated in the thalamus.

392 The mRNA expression of HCN channel genes in CR and KO mice was also assessed.  
393 Previous studies reported that mouse brains express very low levels of *Hcn3* <sup>62</sup>, and our RNA-  
394 seq data showed no significant change in *Hcn3* or expression in the KO mice, therefore, *Hcn3*  
395 expression was not further investigated. The expression levels of mRNAs for *Hcn1*, *Hcn2*, and  
396 *Hcn4* were investigated. Our results show that *Hcn2* mRNA was the most highly expressed  
397 HCN channel gene in the thalamus tissue. *Hcn4* also had prominent expression, while the level  
398 of expression of *Hcn1* was only about 5% of *Hcn2* expression. This result is consistent with  
399 previous research indicating HCN2 and 4 channels are the most highly expressed HCN  
400 channels in the thalamus, and these results along with our sequencing results, provide relative  
401 expression data of HCN mRNA expression in mouse thalamus <sup>62</sup>. *Hcn1* mRNA expression levels  
402 were not significantly affected by *Shox2* KO in comparison to CR mice ( $t_9=1.85$ ,  $P=0.10$ ). *Hcn2*  
403 and *Hcn4* mRNA were significantly reduced in the *Shox2* KO thalamus compared to CR mice

404 (Fig. 3D, E, *Hcn2*:  $t_9=3.92$ ,  $P<0.01$  and *Hcn4*:  $t_9=4.02$ ,  $P<0.01$ : Mann Whitney nonparametric  
405 test). This result also confirmed the RNA-seq results that showed that *Hcn1* mRNA was not  
406 significantly affected in mouse thalamus. Together, these results show that *Shox2* KO  
407 significantly affects expression of mRNAs for HCN and  $Ca^{2+}$  channels. We further investigated  
408 if the proteins for these channels were also affected in the KO mice.

409 Western blot experiments on whole thalamus extract were performed to test the protein  
410 levels of the Cav3.1, HCN2 and HCN4 channels. The expression levels of HCN4 proteins were  
411 significantly decreased in the thalami of KO animals, and there was a trend toward decreased  
412 expression of HCN2 and Cav3.1 proteins compared to CR mice (Fig. 3F,G,H; Cav3.1:  $t_{14}=1.86$ ,  
413  $P=0.08$ ; HCN2:  $t_{16}=2.30$ ,  $P=0.1$ ; Mann Whitney nonparametric test; HCN4:  $t_{14}=2.37$ ,  $P=0.03$ ).  
414 The protein measurements in these Western blot staining results are consistent with  
415 sequencing and RT-qPCR results and confirmed that HCN4 protein expression is modulated by  
416 *Shox2* in the adult thalamus. While the change in expression of these channels is relatively  
417 small, it's important to note that these data are taken from the entire thalamus, including  
418 neurons and glial cells that do not express *Shox2*. The consistency of the sequencing, mRNA  
419 and protein expression is solid evidence that *Shox2* affects expression of these ion channel  
420 genes.

421 Since the expression levels of the channel proteins that underlie currents important for  
422 the bursting properties of the thalamic neurons are regulated by *Shox2* expression, we  
423 assessed the firing and intrinsic properties of thalamic neurons in *Shox2* KO and CR mice. To  
424 best identify a single thalamic nucleus and a homogenous neuron group, the anterior  
425 paraventricular thalamus (PVA), the most rostral and dorsal midline nucleus, was chosen as  
426 the target region for recording. First, cell-attached voltage-clamp recordings were performed  
427 to record the spontaneous action potential currents of PVA neurons without rupturing the cell

428 membrane. Our results indicated that a smaller percentage of cells fired spontaneous action  
429 potentials (active neurons) in KO mice compared to those in CR mice (Fig. 4A, B; CR: 36% (9 of  
430 25 cells; N = 3) vs KO: 14% (5 of 35 cells; N = 4;  $\chi^2$  test,  $\chi^2=3.84$ ,  $P=0.05$ ). Whole-cell patch  
431 clamp recordings revealed the decreased cell excitability in PVA neurons from the KO mice  
432 was not due to significant differences in resting membrane potential between CR and KO cells  
433 (CR:  $-55.5\pm 1.7$  (n=35; N=9) and KO:  $-54.5\pm 1.7$  (n=35; N=10),  $p = 0.9$ ); however, input resistance  
434 was significantly different between cells recorded from KO and CR mice (CR:  $993.4 \pm 52.9$   
435 (n=30; N=9) KO:  $850.3\pm 40.7$  (n=29; N = 9);  $p = 0.04$ ). In addition, an increased action potential  
436 threshold in KO compared to CR mice was observed (Fig. 4C;  $t_{42} = 2.0$ ;  $P < 0.05$ ). These results  
437 suggest that reduced *Shox2* expression affects the firing properties of TCNs.

438 To investigate the spiking responses to depolarizing current injections, we recorded in  
439 current clamp mode and injected 10-50 pA currents to evoke action potentials from resting  
440 potential ( $-50$ - $55$ mV) and  $-70$ mV. The number of action potentials fired in response to current  
441 injection in neurons recorded from *Shox2* KO slices was significantly decreased compared to  
442 that in neurons from CR slices at resting potentials (Fig. 4D; two-way repeat measures ANOVA:  
443 main effect of current injection,  $F_{4,148} = 59.9$ ,  $P < 0.0001$ ; main effect of genotype,  $F_{1,37} = 10.9$ ,  
444  $P < 0.01$ ; interaction,  $F_{4,148} = 4.06$ ,  $P < 0.01$ ). Further investigation to determine effects on  
445 bursting properties showed that the firing properties in response to depolarizing pulses from  
446  $-70$  mV were not affected in the *Shox2* KO cells (Fig. 4E, Two way repeated measures ANOVA:  
447 significant main effect of current injection  $F_{4, 216} = 20.64$ ,  $P < 0.0001$ ; but no significant main  
448 effect of genotype CR vs KO,  $F_{1, 54} = 4.2$ ,  $P = 0.18$  or interaction  $F_{4,216} = 0.49$ ;  $P = 0.79$ ). These  
449 results are consistent with the spontaneous firing results that suggest reduced *Shox2* affects  
450 tonic TCN firing properties at depolarized membrane potentials.

451

452 **Shox2 is critical for HCN currents in the thalamus.**

453 Since HCN currents play a role in the firing properties of thalamocortical neurons<sup>74, 75</sup>,  
454 and *Shox2* affects expression of *Hcn4* mRNA and protein, we investigated the effect of *Shox2*  
455 KO on HCN current by sequential hyperpolarizations in voltage-clamp mode in the presence  
456 of BaCl<sub>2</sub> to block inward rectifier K<sup>+</sup> currents. The amplitude of HCN current was measured as  
457 the difference between the end current of one-second hyperpolarization and the beginning  
458 instantaneous current at -150mV hyperpolarization (Fig. 5A). The HCN current densities in  
459 neurons from *Shox2* KO mice were significantly decreased compared to neurons from CR mice  
460 ( $t_{15}=3.1$ ;  $P = 0.007$ ; Fig. 5B). Recordings were completed in current clamp to determine the  
461 functional impact of reduced  $I_h$ , within the TCNs. Negative current injections from resting  
462 potential (Fig. 5C; 10-90 pA in 10 pA steps) induced significantly smaller voltage sags in the KO  
463 mice compared to CR mice (Fig. 5C,D; Two way ANOVA; main effect of current input  $F_{(5, 55)} =$   
464  $24.5$ ;  $P < 0.0001$  and main effect of genotype  $F_{(1, 11)} = 17.26$  but no interaction  $F_{(5, 55)} = 0.4496$ ;  
465  $P=0.8$ ). Upon release from the hyperpolarizing pulses, fewer KO cells (2/11) exhibited rebound  
466 low threshold Ca<sup>2+</sup> bursts compared to CR (7/10). These results suggest that *Shox2* KO reduced  
467  $I_h$  and physiologically impacts rebound firing of TCNs, that likely also involves T-type calcium  
468 spikes. Significantly, the differences in sag were revealed in the presence of BaCl<sub>2</sub> and not in  
469 control aCSF, which suggests that an inwardly rectifying K<sup>+</sup> current may partially compensate  
470 in the KO for the differences in  $I_h$ .

471 **Shox2 expression affects TCN synaptic activity.**

472 In order to determine the impact of *Shox2* KO on synaptic activity, excitatory  
473 postsynaptic currents (EPSCs) were measured in cells from CR and KO mice. EPSC interevent  
474 interval was significantly decreased in *Shox2* KO neurons compared to CR neurons (Fig. 6A-C;  
475  $t_{50}=2.3$ ;  $P = 0.03$ ), showing increased EPSC frequency in KO slices. Closer investigation revealed

476 instantaneous EPSC frequency was significantly increased in *Shox2* KO mice ( $t_{50} = 3.0$ ;  $P =$   
477  $0.004$ ), suggesting increased EPSC burst frequency in slices from KO mice. Cumulative  
478 frequency plots showed a significant shift toward increased instantaneous frequency  
479 (Kolmogorov-Smirnov,  $P < 0.0001$ ). There was no significant effect on mEPSC amplitude,  
480 although a trend was observed ( $t_{50} = 1.63$ ;  $P = 0.1$ ). These results of increased instantaneous  
481 frequency suggest increased burst glutamatergic input to PVA nucleus neurons in the *Shox2*  
482 KO mice.

### 483 ***Shox2* KO induced thalamus-related behavioral deficits in adult mouse.**

484 The thalamus plays a critical role in sensory and motor information relay and processing,  
485 sleep and arousal, learning and memory, as well as other cognitive functions. The  
486 electrophysiological results indicated that *Shox2* KO impaired thalamic burst-related currents,  
487 synaptic activity and intrinsic spiking properties. We hypothesized that *Shox2* is critical for  
488 proper cognitive and somatosensory behavioral functions in adult mice. To study the specific  
489 contribution of *Shox2* expression in the thalamus to behaviors, including anxiety, depression,  
490 somatosensory information processing as well as learning and memory, two inducible KO  
491 mouse strategies were employed. For the behavioral studies, we used the *Rosa26<sup>CreERT/+</sup>*,  
492 *Shox2<sup>-f</sup>* mice line which is a tamoxifen-inducible global *Shox2* KO, and the *Gbx2<sup>CreERT/+</sup>; Shox2<sup>-</sup>*  
493 *<sup>f</sup>* mice line which is also tamoxifen-inducible but restricts the KO of *Shox2* specifically in the  
494 midline of the thalamus<sup>76, 77</sup> and supplemental Fig. 2.

495 The total distance travelled in an open field test was measured to investigate the overall  
496 activity and general anxiety levels. Distance travelled in the open field in the global *Shox2* KO  
497 mice was not statistically significant compared to CR mice (Fig. 7A,  $t_{26} = 1.48$ ;  $p = 0.15$ ).  
498 Interestingly, the global KO mice spent a significantly higher percentage of time in the center



499 of the open field compared to CR mice (Fig. 7B,  $t_{26}=2.2$ ;  $P=0.04$ ), which is indicative of lower  
500 levels of anxiety in the KO mice <sup>78</sup>.

501 Because the open field test results suggested that global *Shox2* KO mice exhibited lower  
502 anxiety, we investigated depressive-like behaviors using the tail suspension test and the forced  
503 swim test in another cohort of animals <sup>79</sup>. In these tests, the time during which the animals  
504 were actively struggling was measured as mobility time. We observed no significant difference  
505 in mobility time between control and global KO mice in either test (Forced swim test,  $t_{20}=0.39$ ,  
506  $P=0.70$ ; Tail suspension,  $t_{20}=0.85$ ,  $P=0.40$ ; Supplemental Fig. 5A,B), suggesting *Shox2* KO did  
507 not affect depressive-like behaviors.

508 To test the performance of the mice in general somatosensory function, the paw  
509 sensation test was performed. Sticky tape was applied to the plantar surface of the right hind  
510 paw of each mouse, and the latency to the mouse's first reaction to the tape was measured  
511 <sup>49</sup>. The latency of KO mice to react to the tape was significantly longer than that of CR mice  
512 (Fig. 7C;  $t_{26}=2.38$ ,  $P=0.03$ ). The results suggested that *Shox2* KO induced somatosensory  
513 deficits in adult mice.

514 Given that anterior and medial thalamus are critical for learning and memory processes  
515 <sup>80-83</sup>, we tested a subset of the global *Shox2* KO mice in a novel object recognition test which  
516 assesses learning and memory functions <sup>84,85</sup>. The test consisted of a familiarization trial and  
517 a test trial. During the familiarization trial, we measured the time mice spent exploring 2  
518 identical novel objects (see methods) in the open field environment. Animals of both  
519 genotypes explored the 2 objects for similar amounts of time (Fig. 7E, Student's t-test,  $t_{19}=1.7$ ,  
520  $P=0.1$ ). Twenty-four hours later, in the memory test trial, the experiment was repeated but  
521 one of the beakers was replaced with a new object (Fig. 7D). The percentage of time global  
522 *Shox2* KO mice spent around the novel object was significantly decreased compared to that of

523 CR mice in the testing trial (Fig. 7F;  $t_{19} = 2.1$ ,  $P=0.05$ ). These results suggest an impairment of  
524 learning and memory ability of global *Shox2* KO mice.

525 In order to determine whether the impairment in the object recognition test was  
526 mediated by sensory or memory function, we also performed similar behavioral analysis in  
527 the *Gbx2<sup>CreERT</sup>; Shox2* KO mice (Fig. 7 G-K), where *Shox2* is reduced specifically in the medial  
528 thalamus. The open field test was conducted to investigate the overall activity and general  
529 anxiety level of CR and *Gbx2<sup>CreERT</sup>; Shox<sup>fl/-</sup>* KO mice. The total distance travelled by *Shox2* KO  
530 mice was not significantly different compared to CR mice (Fig. 7G,  $t_{21}=0.92$ ;  $p = 0.37$ ). In  
531 addition, unlike the global KO mice, the time spent in the center of the open field of *Gbx2<sup>CreERT</sup>;*  
532 *Shox<sup>fl/-</sup>* KO compared to CR mice was not significantly different (Figure 7H,  $t_{21}=0.50$ ;  $p = 0.62$ ).  
533 We also tested the performance of these mice in general somatosensory function, with the  
534 paw sensation test. The latency to react to the tape of KO mice was not significantly different  
535 compared to CR mice (Fig. 7C;  $t_{20}=0.4626$ ,  $P=0.65$ ). The tape fell off the foot of one KO mouse,  
536 therefore results from that animal were not used. The results suggested that *Shox2* KO in the  
537 medial thalamus did not affect somatosensory function.

538 We also tested the *Gbx2<sup>CreERT</sup>; Shox<sup>fl/-</sup>* mice in the novel object recognition test as  
539 described above. Animals of both genotypes explored the 2 objects for similar amounts of  
540 time in the familiarization trial (Fig. 7J, Student's t-test,  $t_{18}=1.64$ ;  $P=0.11$ ). Twenty-four hours  
541 later, in the memory test trial, the experiment was repeated but one of the beakers was  
542 replaced with a new object (Fig. 7D). The percentage of time *Gbx2<sup>CreERT</sup>; Shox<sup>fl/-</sup>* mice spent  
543 around the novel object was significantly decreased compared to that of CR mice in the testing  
544 trial (Fig. 7F;  $t_{18}=2.28$ ;  $P=0.04$ ). These results suggest an impairment of memory formation in  
545 the *Shox2* KO mice in the medial thalamus, consistent with studies that show the medial  
546 thalamus is important for cognitive function.

547 Since the anterior and medial thalamus have also been implicated in fear memory  
548 formation<sup>86</sup>, cued and contextual fear memory was assessed. Neither contextual ( $t_{21}=0.52$ ;  $p$   
549 = 0.61 nor cued fear memory ( $t_{20}=0.14$ ;  $p = 0.17$ , freezing in one mouse was excluded as an  
550 outlier) was affected in the *Gbx2*<sup>CreERT</sup>; *Shox2*<sup>fl/-</sup> KO mice (Supplemental Fig. 5C,D). This result is  
551 supported by our observations made in td-Tomato animals that show sparse direct inputs to  
552 the hippocampus and the amygdala (Fig. 2M-O). Together, these results suggest that the  
553 groups of neurons expressing *Shox2* in medial thalamus support recognition memory but are  
554 not implicated in fear memory formation or somatosensory information processing.

555

## 556 Discussion

557 This study demonstrates the importance of transcriptional activity of the homeobox  
558 protein transcription factor, *Shox2*, in regulation of firing properties, synaptic connectivity, and  
559 function of thalamocortical neurons in adult thalamus. This assertion is supported by our  
560 investigations at genetic, electrophysiological and behavioral levels. Genetic analysis via RNA-  
561 sequencing and Gene Ontology (GO) analysis revealed that *Shox2* modulates expression of  
562 genes that encode for proteins directly associated with firing properties of TCNs, specifically  
563 voltage-gated ion channels. Further investigation using quantitative PCR and Western blotting  
564 showed that the mRNAs and proteins for several of these ion channels, namely HCN4 is down  
565 regulated in the thalamus of the *Shox2* KO. Electrophysiological analysis showed that *Shox2*-  
566 regulation of ion channels modulates the intrinsic firing properties in these neurons, reducing  
567 neuronal excitability. In addition, the KO neurons received an increased frequency of EPSCs,  
568 suggesting possible presynaptic mechanisms to compensate for decreased membrane  
569 excitability to maintain TCN function. Finally, behavioral investigation revealed that global  
570 *Shox2* KO mice were impaired in an object memory and somatosensory function test,

571 suggesting that *Shox2* is important to maintain normal function of thalamocortical neurons.  
572 In order to discern the somatosensory deficit from the object memory function, we further  
573 investigated mice with specific KO of *Shox2* in the medial thalamus KO (*Gbx2<sup>CreRrt</sup>-Shox2*),  
574 which maintained *Shox2* expression in the lateral thalamus, specifically the VB complex  
575 important for somatosensory processing. These mice were impaired in the object recognition  
576 task and not sensorimotor functions, suggesting that *Shox2* expression in the TCNs of the  
577 medial thalamus is important for cognitive function. These studies are consistent with  
578 previous results that show lesions to the anterior thalamic nuclei can disrupt object  
579 recognition memory in animal models<sup>80, 82, 83, 87</sup>.

580 Previous clinical studies demonstrated that proper thalamic function is critical for  
581 memory formation and consolidation. In humans, damage to the thalamic nuclei, especially  
582 medial and anterior nuclei, causes severe memory deficits known as diencephalic amnesia<sup>12-</sup>  
583 <sup>17</sup>. While the neural circuitry of the effects of *Shox2* expression on recognition memory are  
584 unclear, perhaps these effects occur via effects on TCN connections to retrosplenial cortex as  
585 suggested by the anatomical connectivity indicated in our study (Fig. 2 M-O). The retrosplenial  
586 cortex has been linked to temporal order of recognition, also known as ‘what and when’  
587 associations<sup>88</sup>. Future studies are necessary to determine the specific projections and  
588 functions of the firing properties of the TCNs involved in these functions.

589 Our investigations showed that *Shox2* KO affected tonic firing properties of TCNs. The  
590 functions of the burst and tonic firing properties of thalamocortical neurons are still under  
591 investigation. Tonic spike firing mode is thought to contribute to reliable information transfer  
592 during perceptive states that conveys sensory information to cortex<sup>89, 90</sup>. Burst firing mode  
593 may allow lack of responsiveness to sensory input during sleep and unconsciousness such as  
594 during an absence seizure<sup>91-94</sup>. On the other hand, recent evidence suggests that thalamic

595 bursts can also occur during awake states and convey a high degree of information about  
596 sensory stimuli to serve as a ‘wake-up call’ for cognitive attention<sup>95-100</sup>. Computational studies  
597 suggest that the bursting behavior occurs in response to low-frequency stable inputs, while  
598 single spikes occur in response to higher frequency more dynamic input<sup>101, 102</sup>. Disruptions in  
599 the transitions of firing patterns through effects on intrinsic currents in TCNs would disrupt  
600 normal thalamic function and its contribution to information processing. Our present studies  
601 from the thalamus, together with studies of *Shox2* function from the heart<sup>103, 104</sup> and  
602 excitatory interneurons in spinal cord<sup>34,36</sup>, suggest that *Shox2* is important for maintenance of  
603 tonic firing properties in TCNs.

604 Several lines of evidence indicate that these studies of the role of *Shox2* in pacemaker  
605 function in mice are also applicable to humans. *Shox2* is a super-conserved gene with 99%  
606 amino acid identity between human *SHOX2* and mouse *Shox2*. A recent study found that two  
607 missense mutations within the human *SHOX2* gene are associated with early-onset atrial  
608 fibrillation, likely caused by a defect in pacemaker activity<sup>105,106</sup>. In addition, while mice do  
609 not express the *Shox* gene, human *SHOX* and *SHOX2* have 79% similar amino acid identity, and  
610 the same DNA-binding domains and putative phosphorylation sites. The functional  
611 redundancy in the regulation of heart pacemaker cells’ differentiation between human *SHOX*  
612 and mouse *Shox2* has been demonstrated in mouse models<sup>104, 107</sup>. Therefore, investigation of  
613 *Shox2* function in mouse can extend to evaluate the role of human *SHOX* and *SHOX2* in  
614 humans. Turner syndrome (TS) is one of the most common sex chromosome abnormalities  
615<sup>108, 109</sup> and results from the complete or partial loss of the X chromosome. Most individuals  
616 with TS have short stature, which is associated with the loss of the *SHOX* gene<sup>110-112</sup>. These  
617 individuals are at increased risk for neurodevelopmental issues, including learning disabilities,  
618 visuo-spatial, social and executive function impairments<sup>113</sup> and epilepsy<sup>114-118</sup>. Interestingly,

619 the smallest chromosomal deletion associated with the neurocognitive phenotype included  
620 *SHOX*<sup>119</sup>, suggesting that loss of SHOX may play a role in cognitive impairments in humans.  
621 While the mechanisms of the neurodevelopmental issues in these patients is unclear, our  
622 current study indicates that altering expression of SHOX- or SHOX2-related genes may  
623 contribute to thalamic dysfunctions and some of these neurodevelopmental impairments.

624 Further studies are necessary to determine the specific contribution of *Shox2*-expressing  
625 neurons to thalamocortical circuitry, and the role *Shox2* may play beyond regulation of firing  
626 properties. In addition, future studies will investigate whether *Shox2* plays a critical role during  
627 thalamus development and differentiation, the contribution of these *Shox2*-regulated  
628 currents to overall thalamocortical neuron function, and the mechanisms by which *Shox2*  
629 regulates their expression.

630

### 631 **Figure Legends**

632

633 **Figure 1. *Shox2* is expressed in NeuN+ neurons in the thalamus and not in GFAP+ astrocytes.**  
634 Coronal brain sections through the thalamus of *Shox2*<sup>Cre/+</sup>, Rosa26LacZ mice were co-stained  
635 with NeuN (green) and  $\beta$ -gal (red). Three typical thalamic regions are shown, including  
636 anterior paraventricular thalamus (PVA) (A), dorsal lateral geniculate nucleus (dLGN) (B), and  
637 ventrobasal nucleus (VB) (C). Slices were co-stained for NeuN and the reporter for *Shox2*,  $\beta$ -  
638 gal. *Shox2* is expressed in NeuN+ neurons (red, merged). Right panels are magnifications of  
639 the boxed regions respectively, showing cells that co-express *Shox2* and NeuN. D-F show the  
640 co-expression of astrocyte marker GFAP (green) and  $\beta$ -gal (red), in three thalamic regions: PVA  
641 (D), dLGN (E) and VB (F). Right panels are magnifications of the boxed regions. The arrowheads  
642 show the GFAP+ glia, and the white arrows show *Shox2*-expressing cells as indicated by  $\beta$ -gal.  
643 No cells co-expressed GFAP and *Shox2*. RT: reticular thalamus. AV: anteroventral nucleus of  
644 the thalamus; AD: anterodorsal nucleus of the thalamus. HP: hippocampus.

645

646 **Figure 2. *Shox2* is expressed in glutamatergic thalamocortical neurons but not parvalbumin+  
647 interneurons.** Coronal sections through the thalamus were co-stained with parvalbumin  
648 (green, A, B) and  $\beta$ -gal (red, A, C). Boxes in Figure A are magnified in D. (habenula), E.  
649 Ventrobasal (VB) and reticular nucleus (RT), and F. dorsal lateral geniculate nucleus (dLGN). G.  
650 Panels G-I show *Shox2* expression in coronal slices of rostral to caudal thalamus (G:  
651 Paraventricular nucleus of the thalamus (PVA) relative to Bregma, approx. -1.1; H: lateral  
652 geniculate nucleus (LGN) -2.0; I: Medial geniculate nucleus (MGN) -2.9). M-O: Coronal  
653 sections from rostral (M) to caudal (O) from the Ai27D-*Shox2Cre* in which the presence of  
654 tdTomato indicates *Shox2*-expressing neurons. *Shox2* is expressed in neurons throughout the

655 thalamus and projections to the cortex, strongly targeting layer IV barrel cortex (white arrows)  
656 and layer VI.

657

658

659 **Figure 3. *Shox2* expression affects gene expression and ion channel protein levels.** RNA-  
660 sequencing and analysis were performed as described in methods. **A.** Heatmap, made by  
661 pheatmap, saturated at 1, displays 367 DEGs (adjusted p value <0.1) in the medial thalamus  
662 between control (CR) and *Gbx2<sup>CreErt</sup>, Shox2* KO mice. **B.** Gene ontology (GO) enrichment  
663 analysis of DEGs. All terms with an FDR (analyzed by DAVID functional annotation tool) less  
664 than 0.1 are listed. **C-E.** RT-qPCR results show that *Shox2* KO significantly reduced mRNA level  
665 of *Cacna1g*. (**C**), *Hcn2* (**D**) and *Hcn4* (**E**). **F-H.** *Shox2* KO decreased the protein expression levels  
666 of Ca<sub>v</sub>3.1 (**F**, ~120kD), HCN2 (**G**, ~150kD), and HCN4 (**H**, >250kD) (\*\*, p < 0.01; \*, p<0.05, #,  
667 p<0.1). The bands around ~55-60kD are recognized by the β-tubulin antibody.

668

669 **Figure 4. *Shox2* KO decreases excitability of TCNs in anterior paraventricular thalamus (PVA).**

670 **A.** Example traces of attached-cell recordings of active cells showing spontaneous action  
671 potentials (left) and inactive cells with no action potentials (right). **B.** Bar graph representing  
672 the ratio of active and inactive cells recorded in PVA from KO and CR mice. This ratio is  
673 significantly smaller in KO than in CR mice (\*, p<0.05; n = 9 of 25 CR cells (N = 3) and 5 of 25  
674 KO cells (N = 4). **C.** Whole-cell patch clamp recordings showed that action potential threshold  
675 was significantly increased in *Shox2* KO cells compared to CR cells (KO: n= 16; N= 6; CR: n =23,  
676 N= 9; p =0.04). **D.** Example traces of firing patterns triggered by the injection of ramp current  
677 (10-50 pA) from near membrane potential (-55 mV) in cells recorded from CR – left, black)  
678 and KO mice (right, gray). Right –graph showing reduced spike number in KO cells compared  
679 to CR cells at all membrane potentials when depolarized from -55 mV. **E.** Example traces of  
680 spike firing triggered by the injection of ramp current (10-50 pA) from -70 mV in cells recorded  
681 from CR – left, black) and KO mice (right, gray). Right –graph showing no significant change in  
682 spike number in KO cells compared to CR cells at all membrane potentials when depolarized  
683 from -70 mV. (\*, p < 0.05, \*\*, p < 0.01, \*\*\*, p <0.001).

684

685 **Figure 5. *Shox2* KO decreased HCN current in anterior PVT of neurons.** **A.** An example of HCN  
686 current elicited by hyperpolarizing cell membrane from -50mV to -100mV and -150mV. HCN  
687 current is defined as the current difference between the current at the end of 1s  
688 hyperpolarization and the current peak at the beginning of hyperpolarization as shown in the  
689 figure. **B.** Scatter plot showing that *Shox2* KO (n = 9; N = 3) decreased HCN current density in  
690 anterior PVT of neurons (\*\*, P<0.01) compared to CR neurons (n = 8; N = 2). **C.** Example  
691 current clamp recordings demonstrating inhibitory pulses and sag in CR and KO mice. **D.**  
692 Current voltage plot showing sag amplitude measured in response to negative current  
693 injection (90-10 pA). (\*\*, P < 0.01; n = 7; N= 2; KO n = 6, N = 3)

694

695 **Figure 6. Cells from *Shox2* KO mice receive increased frequency of EPSCs.** **A.** Example of  
696 EPSCs and EPSPs (below) recorded from KO (upper) and CR (lower) mice. **B.** Quantification of  
697 interevent interval, *Shox2* KO cells showed reduced interevent interval (\*, P < 0.05; KO: n =  
698 23; N= 9; CR: n = 29, N = 8). **C.** Quantification of instantaneous frequency, *Shox2* KO cells  
699 showed increased instantaneous frequency (\*\*, P < 0.01). **D.** Cumulative frequency of  
700 instantaneous frequency shows a significant shift toward higher frequencies in KO slices

701 (\*\*\*\*,  $P < 0.0001$ ; Kolmogorov Smirnov test). E. No significant effect of *Shox2* KO was  
702 observed in on EPSC amplitude.

703

704 **Figure 7. *Shox2* inducible KO caused comprehensive thalamus-related behavior deficits. A.**  
705 Results from open field analysis. The total distances travelled by *Rosa<sup>CreErt</sup>, Shox2* KO and CR  
706 mice in 5-minute open field test were similar. **B.** *Rosa<sup>CreErt</sup>, Shox2* KO mice spent a higher  
707 percentage of time in the center of open field than CR mice (\*,  $P < 0.05$ ). **C.** Mice with a  $\sim 1$  cm<sup>2</sup>  
708 sticky tape on the left hind paw were placed in home cage and the latency for the mice to  
709 first react to the tape was measured. *Shox2* KO mice had a longer latency to first react to the  
710 tapes than CR mice ( $P < 0.01$ ). **D-E.** The results of discrimination index showed that *Shox2* KO  
711 impaired mice ability in recognizing novel object in testing trial (\*,  $P = 0.02$ ), while there was  
712 no object preference difference between CR and KO mice in familiarization trial ( $P = 0.33$ ). **F.**  
713 The total distance travelled by *Gbx2<sup>CreErt</sup>, Shox2* KO mice in 5-minute open field test was  
714 significantly decreased compared to that by CR mice. **G.** *Gbx2<sup>CreErt</sup>, Shox2* KO mice spent a  
715 similar percentage of time in the center of compared to CR mice. **H.** *Gbx2<sup>CreErt</sup>, Shox2* KO mice  
716 were not significantly different from CR in the sticky tape test. **I-J.** Object recognition task in  
717 *Gbx2<sup>CreErt</sup>, Shox2* KO mice. The results of discrimination index showed that *Gbx2<sup>CreErt</sup>, Shox2* KO  
718 impaired mice ability in recognizing novel object in testing trial ( $p < 0.05$ ) (K), while there was  
719 no object preference different between CR and KO mice in familiarization trial (J).

720

721

## 722 Supplemental Figures

723 **Supplemental Figure 1.** Schematic diagrams of breeding schemes used to produce  
724 *Rosa26<sup>CreERT/CreERT</sup>, Shox2<sup>f/-</sup>* and *Gbx2<sup>CreErt/CreErt</sup>, Shox<sup>f/-</sup>* mice.

725 **Supplemental Figure 2. Characterization of *Gbx2* expression and *Gbx2*-induced *Shox2* KO in**  
726 **thalamus. A.** GFP staining (red color) represented the expression pattern of *Gbx2* in P25  
727 mouse brain, showing *Gbx2* only expressed in the midline of the thalamus (arrow shows PVT  
728 in midline thalamus) but not lateral thalamus. Blue: DAPI. **B.** qPCR results demonstrating  
729 significant knockdown of *Shox2* mRNA in medial thalamus of *Gbx2<sup>CreErt/CreErt</sup>, Shox<sup>f/-</sup>* mice  
730 compared to CR mice ( $t_6 = 3.9$ ,  $P = 0.008$ ), but no effect on *Shox2* mRNA expression in the  
731 lateral thalamus compared to CR animals (\*\*,  $p < 0.01$ ).

732

733 **Supplemental Figure 3. *Shox2* expression is restricted to thalamus in adult and diencephalon**  
734 **throughout development.** Brain sections demonstrating X-gal staining (or *Shox2* expression)  
735 results from PND25 (**A1-A8**) and PND56 *Shox2<sup>LacZ/+</sup>* (**B1-B4**) and PND56 male *Shox2<sup>cre/+</sup>,*  
736 *Rosa26<sup>LacZ/+</sup>* mouse (**C1-C4**). X-gal staining was observed in anterior thalamus nuclei (ATN),  
737 anterior paraventricular nucleus (PVA), ventrobasal thalamus (VB), dorsal lateral geniculate  
738 nucleus (dLGN) and medial geniculate nucleus (MGN) but was not observed in the cortex (CX),  
739 striatum (STR), hippocampus (HP), amygdala (Ag) or hypothalamus (HT). During development,  
740 *Shox2* did express in in habenula (HB), and some areas of the midbrain including superior  
741 colliculus (SC) and inferior colliculus (IC), but this expression is reduced in adults. Scale bar: 2  
742 mm.

743



744 **Supplemental Figure 4. Strong GFAP immunoreactivity in the hippocampus, but a lack of**  
745 **GFAP+ staining in the thalamus.** Coronal brain section showing strong GFAP+ staining in the  
746 hippocampus, but a dearth of GFAP staining in the thalamus.

747

748 **Supplemental Figure 5. Behavioral analysis of Shox2 KO mice.** Mobility results measured  
749 from CR and *RosaCre;Shox2* KO mice. Forced swim test (A) and tail suspension test (B). No  
750 significant differences in struggling time between CR and KO mice were observed. C,D.  
751 Freezing behavior measured in cued and contextual fear conditioning in *Gbx2Cre; Shox2KO*  
752 mice. No significant differences in freezing behavior to the context or cue were observed.

753

754 **Acknowledgements:** Funding NIH grants R21NS101482 to LAS and R01 HL136326 to YPC.

755 **Authorship statement:** DY and MM conceived experimental design, performed experiments,  
756 and wrote the manuscript. YS, XH, IF, CN, EM, SR contributed data. CS, WY (posthumous)  
757 contributed to early planning stages. YPC provided animals and reagents and LAS contributed  
758 to overall design and wrote manuscript.

759

760

761

## 762 **References :**

763

- 764 1. Bal, T. & McCormick, D.A. What stops synchronized thalamocortical oscillations? *Neuron* **17**, 297-308  
765 (1996).
- 766 2. Kim, J.H., Kim, J.B., Seo, W.K., Suh, S.I. & Koh, S.B. Volumetric and shape analysis of thalamus in  
767 idiopathic generalized epilepsy. *J Neurol* **260**, 1846-1854 (2013).
- 768 3. Williams, D. The thalamus and epilepsy. *Brain : a journal of neurology* **88**, 539-556 (1965).
- 769 4. Mory, S.B. *et al.* Structural abnormalities of the thalamus in juvenile myoclonic epilepsy. *Epilepsy &*  
770 *behavior : E&B* **21**, 407-411 (2011).
- 771 5. Nair, A., Treiber, J.M., Shukla, D.K., Shih, P. & Muller, R.A. Impaired thalamocortical connectivity in autism  
772 spectrum disorder: a study of functional and anatomical connectivity. *Brain : a journal of neurology* **136**,  
773 1942-1955 (2013).
- 774 6. Tsatsanis, K.D. *et al.* Reduced thalamic volume in high-functioning individuals with autism. *Biol*  
775 *Psychiatry* **53**, 121-129 (2003).
- 776 7. Muller, R.A. *et al.* Underconnected, but how? A survey of functional connectivity MRI studies in autism  
777 spectrum disorders. *Cerebral cortex* **21**, 2233-2243 (2011).
- 778 8. Andreasen, N.C. The role of the thalamus in schizophrenia. *Can J Psychiatry* **42**, 27-33 (1997).
- 779 9. Brickman, A.M. *et al.* Thalamus size and outcome in schizophrenia. *Schizophr Res* **71**, 473-484 (2004).
- 780 10. Pinault, D. Dysfunctional thalamus-related networks in schizophrenia. *Schizophr Bull* **37**, 238-243 (2011).
- 781 11. Woodward, N.D., Karbasforoushan, H. & Heckers, S. Thalamocortical dysconnectivity in schizophrenia.  
782 *Am J Psychiatry* **169**, 1092-1099 (2012).
- 783 12. Warren, J.D., Thompson, P.D. & Thompson, P.D. Diencephalic amnesia and apraxia after left thalamic  
784 infarction. *J Neurol Neurosurg Psychiatry* **68**, 248 (2000).

- 785 13. Van der Werf, Y.D., Jolles, J., Witter, M.P. & Uylings, H.B. Contributions of thalamic nuclei to declarative  
786 memory functioning. *Cortex* **39**, 1047-1062 (2003).
- 787 14. Thielen, J.W., Takashima, A., Rutters, F., Tendolkar, I. & Fernandez, G. Transient relay function of midline  
788 thalamic nuclei during long-term memory consolidation in humans. *Learning & memory* **22**, 527-531  
789 (2015).
- 790 15. Graff-Radford, N.R., Tranel, D., Van Hoesen, G.W. & Brandt, J.P. Diencephalic amnesia. *Brain : a journal*  
791 *of neurology* **113 ( Pt 1)**, 1-25 (1990).
- 792 16. Garden, D.L. *et al.* Anterior thalamic lesions stop synaptic plasticity in retrosplenial cortex slices:  
793 expanding the pathology of diencephalic amnesia. *Brain : a journal of neurology* **132**, 1847-1857 (2009).
- 794 17. Dzieciol, A.M. *et al.* Hippocampal and diencephalic pathology in developmental amnesia. *Cortex* **86**, 33-  
795 44 (2017).
- 796 18. Llinas, R. & Jahnsen, H. Electrophysiology of mammalian thalamic neurones in vitro. *Nature* **297**, 406-  
797 408 (1982).
- 798 19. Jahnsen, H. & Llinas, R. Ionic basis for the electro-responsiveness and oscillatory properties of guinea-  
799 pig thalamic neurones in vitro. *The Journal of physiology* **349**, 227-247 (1984).
- 800 20. Deschenes, M., Paradis, M., Roy, J.P. & Steriade, M. Electrophysiology of neurons of lateral thalamic  
801 nuclei in cat: resting properties and burst discharges. *Journal of neurophysiology* **51**, 1196-1219 (1984).
- 802 21. McCormick, D.A. & Bal, T. Sleep and arousal: thalamocortical mechanisms. *Annual review of*  
803 *neuroscience* **20**, 185-215 (1997).
- 804 22. Clement-Jones, M. *et al.* The short stature homeobox gene SHOX is involved in skeletal abnormalities in  
805 Turner syndrome. *Human molecular genetics* **9**, 695-702 (2000).
- 806 23. De Baere, E., Speleman, F., Van Roy, N., De Paepe, A. & Messiaen, L. Assignment of SHOX2 (alias OG12X  
807 and SHOT) to human chromosome bands 3q25-->q26.1 by in situ hybridization. *Cytogenetics and cell*  
808 *genetics* **82**, 228-229 (1998).
- 809 24. Sun, C., Zhang, T., Liu, C., Gu, S. & Chen, Y. Generation of Shox2-Cre allele for tissue specific manipulation  
810 of genes in the developing heart, palate, and limb. *Genesis* **51**, 515-522 (2013).
- 811 25. Greisas, A. & Zlochiver, S. Modulation of cardiac pacemaker inter beat intervals by sinoatrial fibroblasts  
812 -a numerical study. *Conf Proc IEEE Eng Med Biol Soc* **2016**, 165-168 (2016).
- 813 26. Cribbs, L. T-type calcium channel expression and function in the diseased heart. *Channels (Austin)* **4**,  
814 447-452 (2010).
- 815 27. Ludwig, A. *et al.* Absence epilepsy and sinus dysrhythmia in mice lacking the pacemaker channel HCN2.  
816 *The EMBO journal* **22**, 216-224 (2003).
- 817 28. Sun, C. *et al.* The short stature homeobox 2 (Shox2)-bone morphogenetic protein (BMP) pathway  
818 regulates dorsal mesenchymal protrusion development and its temporary function as a pacemaker  
819 during cardiogenesis. *The Journal of biological chemistry* **290**, 2007-2023 (2015).
- 820 29. Ye, W. *et al.* A common Shox2-Nkx2-5 antagonistic mechanism primes the pacemaker cell fate in the  
821 pulmonary vein myocardium and sinoatrial node. *Development* **142**, 2521-2532 (2015).
- 822 30. Ionta, V. *et al.* SHOX2 overexpression favors differentiation of embryonic stem cells into cardiac  
823 pacemaker cells, improving biological pacing ability. *Stem cell reports* **4**, 129-142 (2015).
- 824 31. Wang, J. *et al.* Pitx2 prevents susceptibility to atrial arrhythmias by inhibiting left-sided pacemaker  
825 specification. *Proceedings of the National Academy of Sciences of the United States of America* **107**,  
826 9753-9758 (2010).
- 827 32. Rosin, J.M., Kurrasch, D.M. & Cobb, J. Shox2 is required for the proper development of the facial motor  
828 nucleus and the establishment of the facial nerves. *BMC neuroscience* **16**, 39 (2015).
- 829 33. Rosin, J.M. *et al.* Mice lacking the transcription factor SHOX2 display impaired cerebellar development  
830 and deficits in motor coordination. *Developmental biology* **399**, 54-67 (2015).
- 831 34. Dougherty, K.J. *et al.* Locomotor rhythm generation linked to the output of spinal shox2 excitatory

- 832 interneurons. *Neuron* **80**, 920-933 (2013).
- 833 35. Abdo, H. *et al.* Dependence on the transcription factor Shox2 for specification of sensory neurons  
834 conveying discriminative touch. *The European journal of neuroscience* **34**, 1529-1541 (2011).
- 835 36. Ha, N.T. & Dougherty, K.J. Spinal Shox2 interneuron interconnectivity related to function and  
836 development. *Elife* **7** (2018).
- 837 37. Soriano, P. Generalized lacZ expression with the ROSA26 Cre reporter strain. *Nat Genet* **21**, 70-71 (1999).
- 838 38. Patro, R., Duggal, G., Love, M.I., Irizarry, R.A. & Kingsford, C. Salmon provides fast and bias-aware  
839 quantification of transcript expression. *Nat Methods* **14**, 417-419 (2017).
- 840 39. Love, M.I., Huber, W. & Anders, S. Moderated estimation of fold change and dispersion for RNA-seq data  
841 with DESeq2. *Genome Biol* **15**, 550 (2014).
- 842 40. Huang da, W., Sherman, B.T. & Lempicki, R.A. Systematic and integrative analysis of large gene lists using  
843 DAVID bioinformatics resources. *Nat Protoc* **4**, 44-57 (2009).
- 844 41. Huang da, W., Sherman, B.T. & Lempicki, R.A. Bioinformatics enrichment tools: paths toward the  
845 comprehensive functional analysis of large gene lists. *Nucleic acids research* **37**, 1-13 (2009).
- 846 42. Valente, V. *et al.* Selection of suitable housekeeping genes for expression analysis in glioblastoma using  
847 quantitative RT-PCR. *BMC molecular biology* **10**, 17 (2009).
- 848 43. Li, B. *et al.* Identification of optimal reference genes for RT-qPCR in the rat hypothalamus and intestine  
849 for the study of obesity. *Int J Obes (Lond)* **38**, 192-197 (2014).
- 850 44. Puil, E., Gimbarzevsky, B. & Miura, R.M. Quantification of membrane properties of trigeminal root  
851 ganglion neurons in guinea pigs. *Journal of neurophysiology* **55**, 995-1016 (1986).
- 852 45. Zhang, C., Bosch, M.A., Rick, E.A., Kelly, M.J. & Ronnekleiv, O.K. 17Beta-estradiol regulation of T-type  
853 calcium channels in gonadotropin-releasing hormone neurons. *The Journal of neuroscience : the official  
854 journal of the Society for Neuroscience* **29**, 10552-10562 (2009).
- 855 46. Bhattacharjee, A., Whitehurst, R.M., Jr., Zhang, M., Wang, L. & Li, M. T-type calcium channels facilitate  
856 insulin secretion by enhancing general excitability in the insulin-secreting beta-cell line, INS-1.  
857 *Endocrinology* **138**, 3735-3740 (1997).
- 858 47. Lee, J.H., Gomora, J.C., Cribbs, L.L. & Perez-Reyes, E. Nickel block of three cloned T-type calcium channels:  
859 low concentrations selectively block alpha1H. *Biophysical journal* **77**, 3034-3042 (1999).
- 860 48. Antunes, M. & Biala, G. The novel object recognition memory: neurobiology, test procedure, and its  
861 modifications. *Cogn Process* **13**, 93-110 (2012).
- 862 49. Arakawa, H. *et al.* Thalamic NMDA receptor function is necessary for patterning of the thalamocortical  
863 somatosensory map and for sensorimotor behaviors. *The Journal of neuroscience : the official journal  
864 of the Society for Neuroscience* **34**, 12001-12014 (2014).
- 865 50. Can, A. *et al.* The mouse forced swim test. *J Vis Exp*, e3638 (2012).
- 866 51. Gusel'nikova, V.V. & Korzhevskiy, D.E. NeuN As a Neuronal Nuclear Antigen and Neuron Differentiation  
867 Marker. *Acta Naturae* **7**, 42-47 (2015).
- 868 52. Herculano-Houzel, S. & Lent, R. Isotropic fractionator: a simple, rapid method for the quantification of  
869 total cell and neuron numbers in the brain. *The Journal of neuroscience : the official journal of the  
870 Society for Neuroscience* **25**, 2518-2521 (2005).
- 871 53. Eng, L.F. Glial fibrillary acidic protein (GFAP): the major protein of glial intermediate filaments in  
872 differentiated astrocytes. *J Neuroimmunol* **8**, 203-214 (1985).
- 873 54. Yang, Z. & Wang, K.K. Glial fibrillary acidic protein: from intermediate filament assembly and gliosis to  
874 neurobiomarker. *Trends in neurosciences* **38**, 364-374 (2015).
- 875 55. Arcelli, P., Frassoni, C., Regondi, M.C., De Biasi, S. & Spreafico, R. GABAergic neurons in mammalian  
876 thalamus: a marker of thalamic complexity? *Brain research bulletin* **42**, 27-37 (1997).
- 877 56. Song, I. *et al.* Role of the alpha1G T-type calcium channel in spontaneous absence seizures in mutant  
878 mice. *The Journal of neuroscience : the official journal of the Society for Neuroscience* **24**, 5249-5257

- 879 (2004).
- 880 57. Kim, D. *et al.* Lack of the burst firing of thalamocortical relay neurons and resistance to absence seizures  
881 in mice lacking alpha(1G) T-type Ca(2+) channels. *Neuron* **31**, 35-45 (2001).
- 882 58. Zhang, Y., Vilaythong, A.P., Yoshor, D. & Noebels, J.L. Elevated thalamic low-voltage-activated currents  
883 precede the onset of absence epilepsy in the SNAP25-deficient mouse mutant coloboma. *The Journal*  
884 *of neuroscience : the official journal of the Society for Neuroscience* **24**, 5239-5248 (2004).
- 885 59. Talley, E.M. *et al.* Differential distribution of three members of a gene family encoding low voltage-  
886 activated (T-type) calcium channels. *The Journal of neuroscience : the official journal of the Society for*  
887 *Neuroscience* **19**, 1895-1911 (1999).
- 888 60. Kim, D. *et al.* Lack of the burst firing of thalamocortical relay neurons and resistance to absence seizures  
889 in mice lacking alpha(1G) T-type Ca(2+) channels, *Neuron* **31**, 35-45 (2001).
- 890 61. Anderson, M.P. *et al.* Thalamic Cav3.1 T-type Ca<sup>2+</sup> channel plays a crucial role in stabilizing sleep.  
891 *Proceedings of the National Academy of Sciences of the United States of America* **102**, 1743-1748 (2005).
- 892 62. Moosmang, S., Biel, M., Hofmann, F. & Ludwig, A. Differential distribution of four hyperpolarization-  
893 activated cation channels in mouse brain. *Biological chemistry* **380**, 975-980 (1999).
- 894 63. Llinas, R.R. & Steriade, M. Bursting of thalamic neurons and states of vigilance. *Journal of*  
895 *neurophysiology* **95**, 3297-3308 (2006).
- 896 64. Puil, E., Meiri, H. & Yarom, Y. Resonant behavior and frequency preferences of thalamic neurons. *Journal*  
897 *of neurophysiology* **71**, 575-582 (1994).
- 898 65. Hutcheon, B., Miura, R.M., Yarom, Y. & Puil, E. Low-threshold calcium current and resonance in thalamic  
899 neurons: a model of frequency preference. *Journal of neurophysiology* **71**, 583-594 (1994).
- 900 66. Hutcheon, B. & Yarom, Y. Resonance, oscillation and the intrinsic frequency preferences of neurons.  
901 *Trends in neurosciences* **23**, 216-222 (2000).
- 902 67. Xue, W.N. *et al.* SK- and h-current contribute to the generation of theta-like resonance of rat substantia  
903 nigra pars compacta dopaminergic neurons at hyperpolarized membrane potentials. *Brain Struct Funct*  
904 **217**, 379-394 (2012).
- 905 68. Hu, H., Vervaeke, K. & Storm, J.F. Two forms of electrical resonance at theta frequencies, generated by  
906 M-current, h-current and persistent Na<sup>+</sup> current in rat hippocampal pyramidal cells. *The Journal of*  
907 *physiology* **545**, 783-805 (2002).
- 908 69. Williams, S.R., Toth, T.I., Turner, J.P., Hughes, S.W. & Crunelli, V. The 'window' component of the low  
909 threshold Ca<sup>2+</sup> current produces input signal amplification and bistability in cat and rat thalamocortical  
910 neurones. *The Journal of physiology* **505 ( Pt 3)**, 689-705 (1997).
- 911 70. Hughes, S.W., Cope, D.W., Toth, T.I., Williams, S.R. & Crunelli, V. All thalamocortical neurones possess a  
912 T-type Ca<sup>2+</sup> 'window' current that enables the expression of bistability-mediated activities. *The Journal*  
913 *of physiology* **517 ( Pt 3)**, 805-815 (1999).
- 914 71. Crunelli, V., Toth, T.I., Cope, D.W., Blethyn, K. & Hughes, S.W. The 'window' T-type calcium current in  
915 brain dynamics of different behavioural states. *The Journal of physiology* **562**, 121-129 (2005).
- 916 72. Crunelli, V., Cope, D.W. & Hughes, S.W. Thalamic T-type Ca<sup>2+</sup> channels and NREM sleep. *Cell calcium* **40**,  
917 175-190 (2006).
- 918 73. Dreyfus, F.M. *et al.* Selective T-type calcium channel block in thalamic neurons reveals channel  
919 redundancy and physiological impact of I(T)window. *The Journal of neuroscience : the official journal of*  
920 *the Society for Neuroscience* **30**, 99-109 (2010).
- 921 74. Zobeiri, M. *et al.* Modulation of thalamocortical oscillations by TRIP8b, an auxiliary subunit for HCN  
922 channels. *Brain Struct Funct* (2017).
- 923 75. Zobeiri, M. *et al.* The Hyperpolarization-Activated HCN4 Channel is Important for Proper Maintenance  
924 of Oscillatory Activity in the Thalamocortical System. *Cerebral cortex* (2019).
- 925 76. Mallika, C., Guo, Q. & Li, J.Y. Gbx2 is essential for maintaining thalamic neuron identity and repressing

- 926           habenular characters in the developing thalamus. *Developmental biology* **407**, 26-39 (2015).
- 927   77.   Chen, L., Guo, Q. & Li, J.Y. Transcription factor Gbx2 acts cell-nonautonomously to regulate the formation  
928           of lineage-restriction boundaries of the thalamus. *Development* **136**, 1317-1326 (2009).
- 929   78.   Seibenhener, M.L. & Wooten, M.C. Use of the Open Field Maze to measure locomotor and anxiety-like  
930           behavior in mice. *J Vis Exp*, e52434 (2015).
- 931   79.   Castagne, V., Moser, P., Roux, S. & Porsolt, R.D. Rodent models of depression: forced swim and tail  
932           suspension behavioral despair tests in rats and mice. *Curr Protoc Neurosci* **Chapter 8**, Unit 8 10A (2011).
- 933   80.   Jankowski, M.M. *et al.* The anterior thalamus provides a subcortical circuit supporting memory and  
934           spatial navigation. *Frontiers in systems neuroscience* **7**, 45 (2013).
- 935   81.   Aggleton, J.P. & Sahgal, A. The contribution of the anterior thalamic nuclei to anterograde amnesia.  
936           *Neuropsychologia* **31**, 1001-1019 (1993).
- 937   82.   Aggleton, J.P. & Mishkin, M. Memory impairments following restricted medial thalamic lesions in  
938           monkeys. *Experimental brain research* **52**, 199-209 (1983).
- 939   83.   Aggleton, J.P., Dumont, J.R. & Warburton, E.C. Unraveling the contributions of the diencephalon to  
940           recognition memory: a review. *Learning & memory* **18**, 384-400 (2011).
- 941   84.   Vogel-Ciernia, A. & Wood, M.A. Examining object location and object recognition memory in mice. *Curr*  
942           *Protoc Neurosci* **69**, 8 31 31-17 (2014).
- 943   85.   Murai, T., Okuda, S., Tanaka, T. & Ohta, H. Characteristics of object location memory in mice: Behavioral  
944           and pharmacological studies. *Physiology & behavior* **90**, 116-124 (2007).
- 945   86.   Padilla-Coreano, N., Do-Monte, F.H. & Quirk, G.J. A time-dependent role of midline thalamic nuclei in  
946           the retrieval of fear memory. *Neuropharmacology* **62**, 457-463 (2012).
- 947   87.   Dumont, J.R. & Aggleton, J.P. Dissociation of recognition and recency memory judgments after anterior  
948           thalamic nuclei lesions in rats. *Behavioral neuroscience* **127**, 415-431 (2013).
- 949   88.   Powell, A.L. *et al.* The retrosplenial cortex and object recency memory in the rat. *The European journal*  
950           *of neuroscience* **45**, 1451-1464 (2017).
- 951   89.   Elijah, D.H., Samengo, I. & Montemurro, M.A. Thalamic neuron models encode stimulus information by  
952           burst-size modulation. *Front Comput Neurosci* **9**, 113 (2015).
- 953   90.   Sherman, S.M. Dual response modes in lateral geniculate neurons: mechanisms and functions. *Vis*  
954           *Neurosci* **13**, 205-213 (1996).
- 955   91.   McCormick, D.A. & Pape, H.C. Properties of a hyperpolarization-activated cation current and its role in  
956           rhythmic oscillation in thalamic relay neurones. *The Journal of physiology* **431**, 291-318 (1990).
- 957   92.   McCormick, D.A. & Feuser, H.R. Functional implications of burst firing and single spike activity in lateral  
958           geniculate relay neurons. *Neuroscience* **39**, 103-113 (1990).
- 959   93.   Jeanmonod, D., Magnin, M. & Morel, A. Low-threshold calcium spike bursts in the human thalamus.  
960           Common physiopathology for sensory, motor and limbic positive symptoms. *Brain : a journal of*  
961           *neurology* **119 ( Pt 2)**, 363-375 (1996).
- 962   94.   Guillery, R.W. & Sherman, S.M. Thalamic relay functions and their role in corticocortical communication:  
963           generalizations from the visual system. *Neuron* **33**, 163-175 (2002).
- 964   95.   Sherman, S.M. & Guillery, R.W. The role of the thalamus in the flow of information to the cortex. *Philos*  
965           *Trans R Soc Lond B Biol Sci* **357**, 1695-1708 (2002).
- 966   96.   Sherman, S.M. & Guillery, R.W. Functional organization of thalamocortical relays. *Journal of*  
967           *neurophysiology* **76**, 1367-1395 (1996).
- 968   97.   Sherman, S.M. A wake-up call from the thalamus. *Nature neuroscience* **4**, 344-346 (2001).
- 969   98.   Reinagel, P., Godwin, D., Sherman, S.M. & Koch, C. Encoding of visual information by LGN bursts. *Journal*  
970           *of neurophysiology* **81**, 2558-2569 (1999).
- 971   99.   Marlinski, V. & Beloozerova, I.N. Burst firing of neurons in the thalamic reticular nucleus during  
972           locomotion. *Journal of neurophysiology* **112**, 181-192 (2014).

- 973 100. Guido, W., Lu, S.M. & Sherman, S.M. Relative contributions of burst and tonic responses to the receptive  
974 field properties of lateral geniculate neurons in the cat. *Journal of neurophysiology* **68**, 2199-2211  
975 (1992).
- 976 101. Zeldenrust, F., Wadman, W.J. & Englitz, B. Neural Coding With Bursts-Current State and Future  
977 Perspectives. *Front Comput Neurosci* **12**, 48 (2018).
- 978 102. Zeldenrust, F., Chameau, P. & Wadman, W.J. Spike and burst coding in thalamocortical relay cells. *PLoS*  
979 *Comput Biol* **14**, e1005960 (2018).
- 980 103. Liu, H. *et al.* The role of Shox2 in SAN development and function. *Pediatric cardiology* **33**, 882-889 (2012).
- 981 104. Liu, H. *et al.* Functional redundancy between human SHOX and mouse Shox2 genes in the regulation of  
982 sinoatrial node formation and pacemaking function. *The Journal of biological chemistry* **286**, 17029-  
983 17038 (2011).
- 984 105. Li, N. *et al.* A SHOX2 loss-of-function mutation underlying familial atrial fibrillation. *Int J Med Sci* **15**,  
985 1564-1572 (2018).
- 986 106. Hoffmann, S. *et al.* Coding and non-coding variants in the SHOX2 gene in patients with early-onset atrial  
987 fibrillation. *Basic research in cardiology* **111**, 36 (2016).
- 988 107. Liu, H. *et al.* Phosphorylation of Shox2 is required for its function to control sinoatrial node formation.  
989 *Journal of the American Heart Association* **3**, e000796 (2014).
- 990 108. Nielsen, J. & Wohler, M. Sex chromosome abnormalities found among 34,910 newborn children:  
991 results from a 13-year incidence study in Arhus, Denmark. *Birth Defects Orig Artic Ser* **26**, 209-223 (1990).
- 992 109. Jacobs, P. *et al.* Turner syndrome: a cytogenetic and molecular study. *Ann Hum Genet* **61**, 471-483 (1997).
- 993 110. Oliveira, C.S. & Alves, C. The role of the SHOX gene in the pathophysiology of Turner syndrome.  
994 *Endocrinologia y nutricion : organo de la Sociedad Espanola de Endocrinologia y Nutricion* **58**, 433-442  
995 (2011).
- 996 111. Joseph, M. *et al.* Xp pseudoautosomal gene haploinsufficiency and linear growth deficiency in three  
997 girls with chromosome Xp22;Yq11 translocation. *Journal of medical genetics* **33**, 906-911 (1996).
- 998 112. Blaschke, R.J. *et al.* SHOT, a SHOX-related homeobox gene, is implicated in craniofacial, brain, heart, and  
999 limb development. *Proceedings of the National Academy of Sciences of the United States of America* **95**,  
1000 2406-2411 (1998).
- 1001 113. Mauger, C. *et al.* Executive Functions in Children and Adolescents with Turner Syndrome: A Systematic  
1002 Review and Meta-Analysis. *Neuropsychol Rev* **28**, 188-215 (2018).
- 1003 114. Zhao, H. & Lian, Y.J. Epilepsy associated with Turner syndrome. *Neurol India* **63**, 631-633 (2015).
- 1004 115. Saad, K. *et al.* Turner syndrome: review of clinical, neuropsychiatric, and EEG status: an experience of  
1005 tertiary center. *Acta Neurol Belg* **114**, 1-9 (2014).
- 1006 116. Puusepp, H., Zordania, R., Paal, M., Bartsch, O. & Ounap, K. Girl with partial Turner syndrome and  
1007 absence epilepsy. *Pediatr Neurol* **38**, 289-292 (2008).
- 1008 117. Magara, S. *et al.* Rub epilepsy in an infant with Turner syndrome. *Brain Dev* **37**, 725-728 (2015).
- 1009 118. Jhang, K.M., Chang, T.M., Chen, M. & Liu, C.S. Generalized epilepsy in a patient with mosaic Turner  
1010 syndrome: a case report. *J Med Case Rep* **8**, 109 (2014).
- 1011 119. Knickmeyer, R.C. & Davenport, M. Turner syndrome and sexual differentiation of the brain: implications  
1012 for understanding male-biased neurodevelopmental disorders. *J Neurodev Disord* **3**, 293-306 (2011).
- 1013

NeuN

$\beta$ -gal

NeuN/ $\beta$ -gal/DAPI

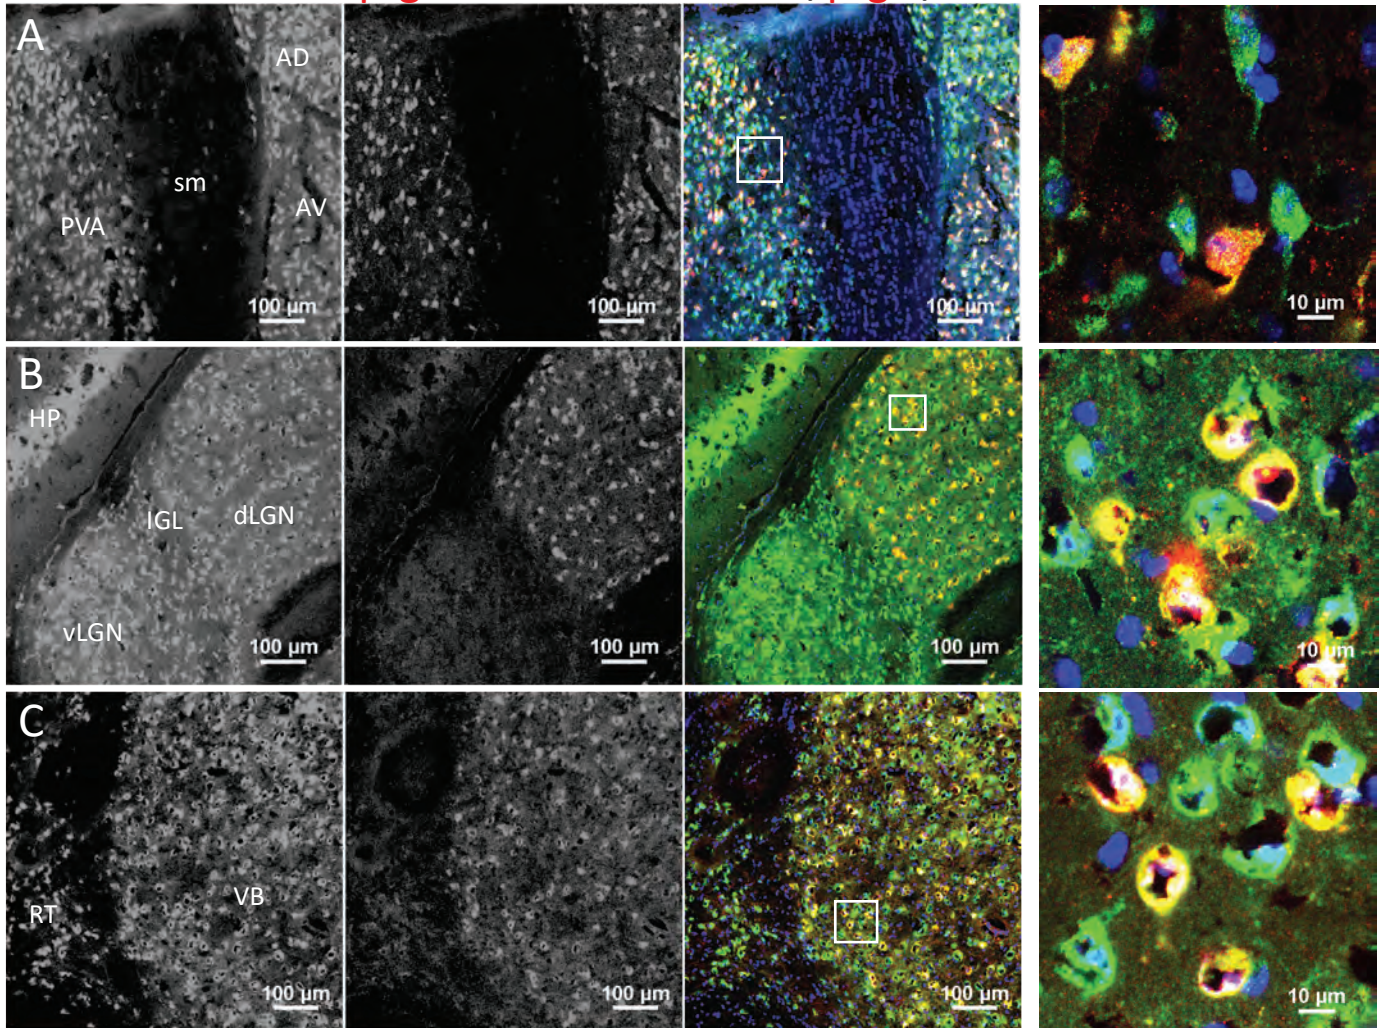

GFAP

$\beta$ -gal

DAPI/GFAP/ $\beta$ -gal

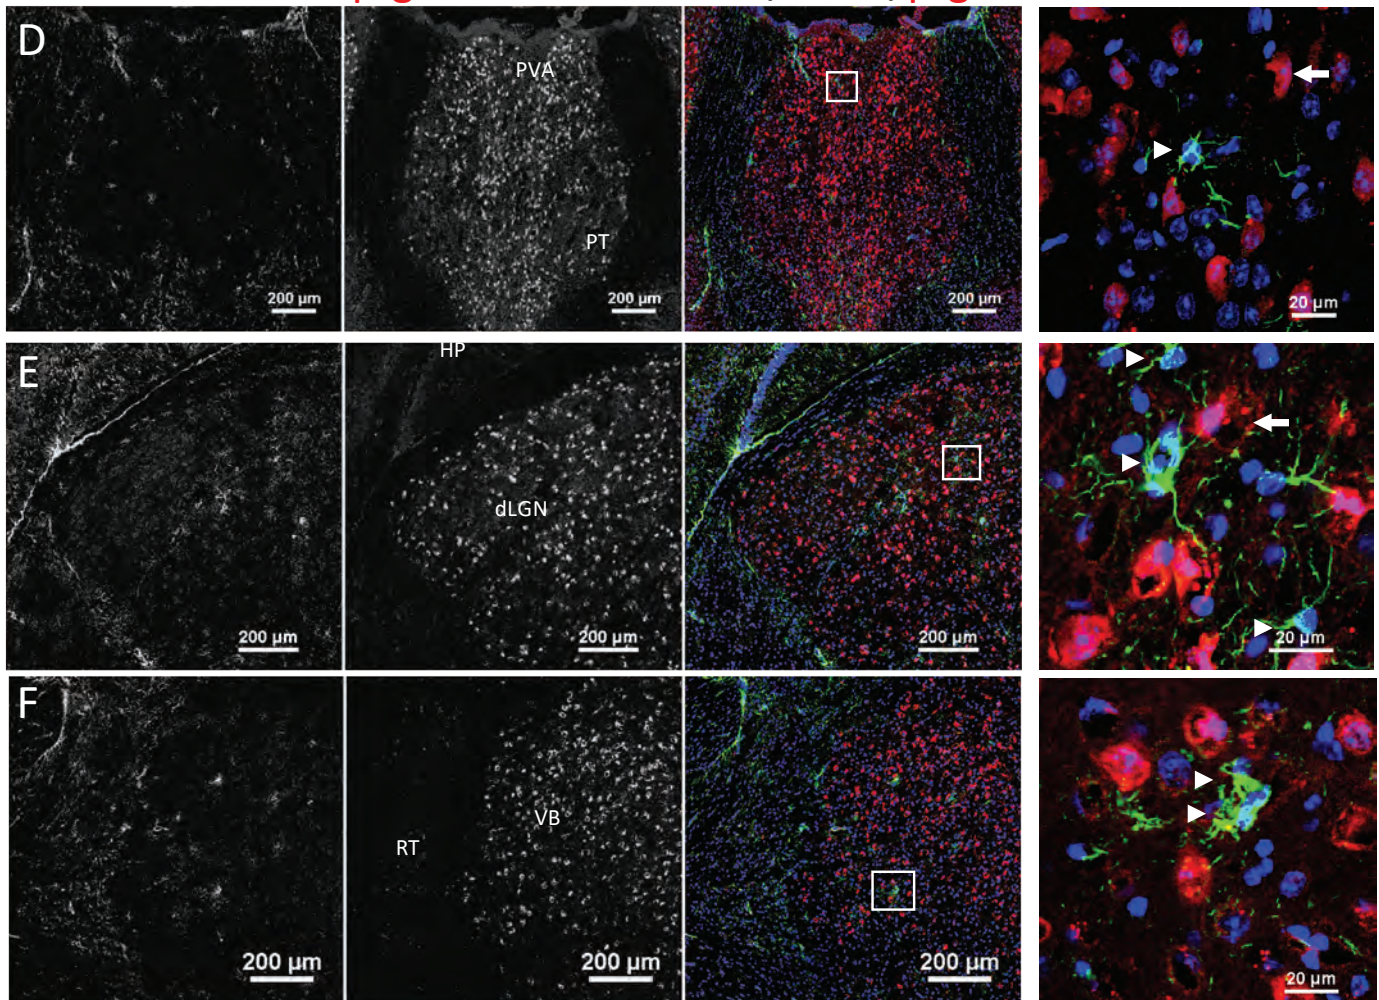

Figure 2. Yu et. al.

DAPI/PV/ $\beta$ -gal

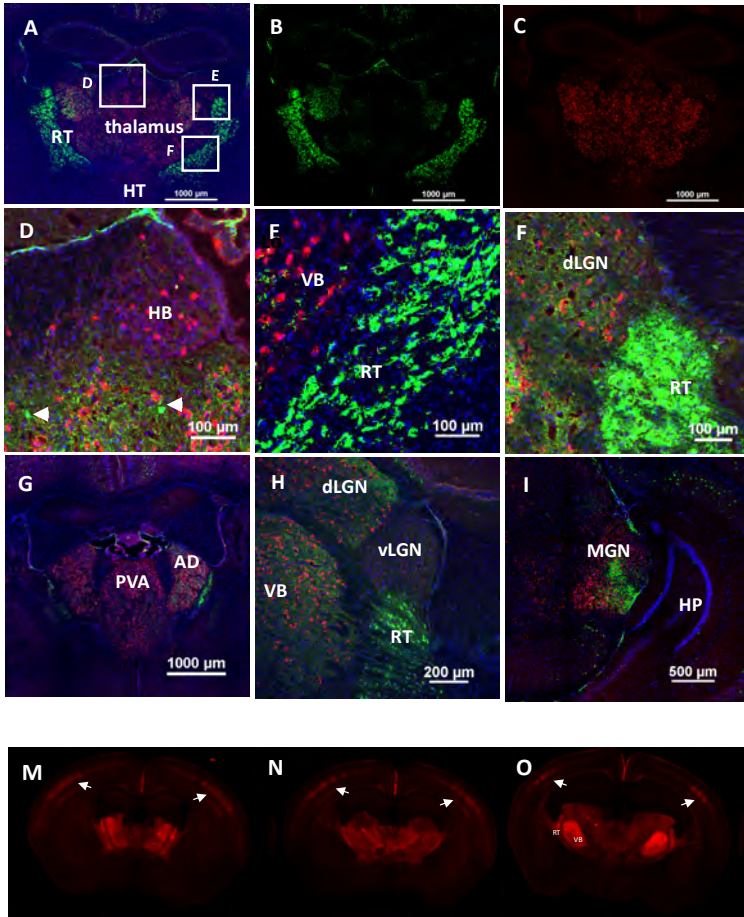



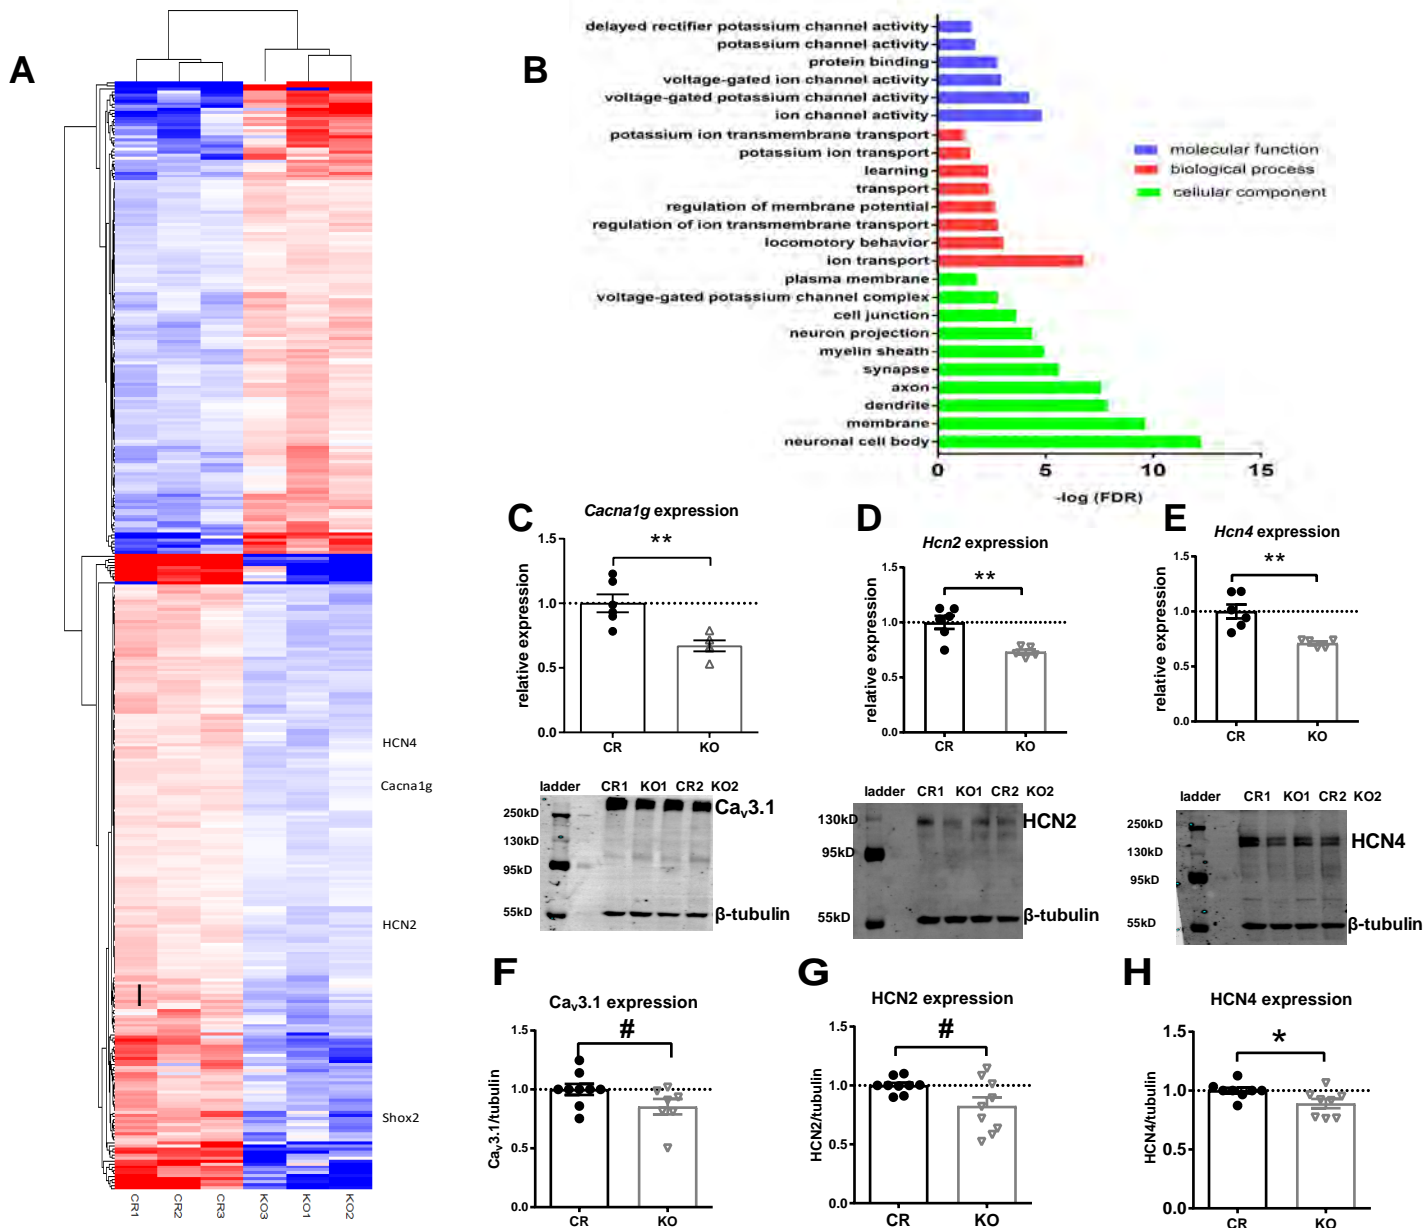

Figure 3. Yu et al

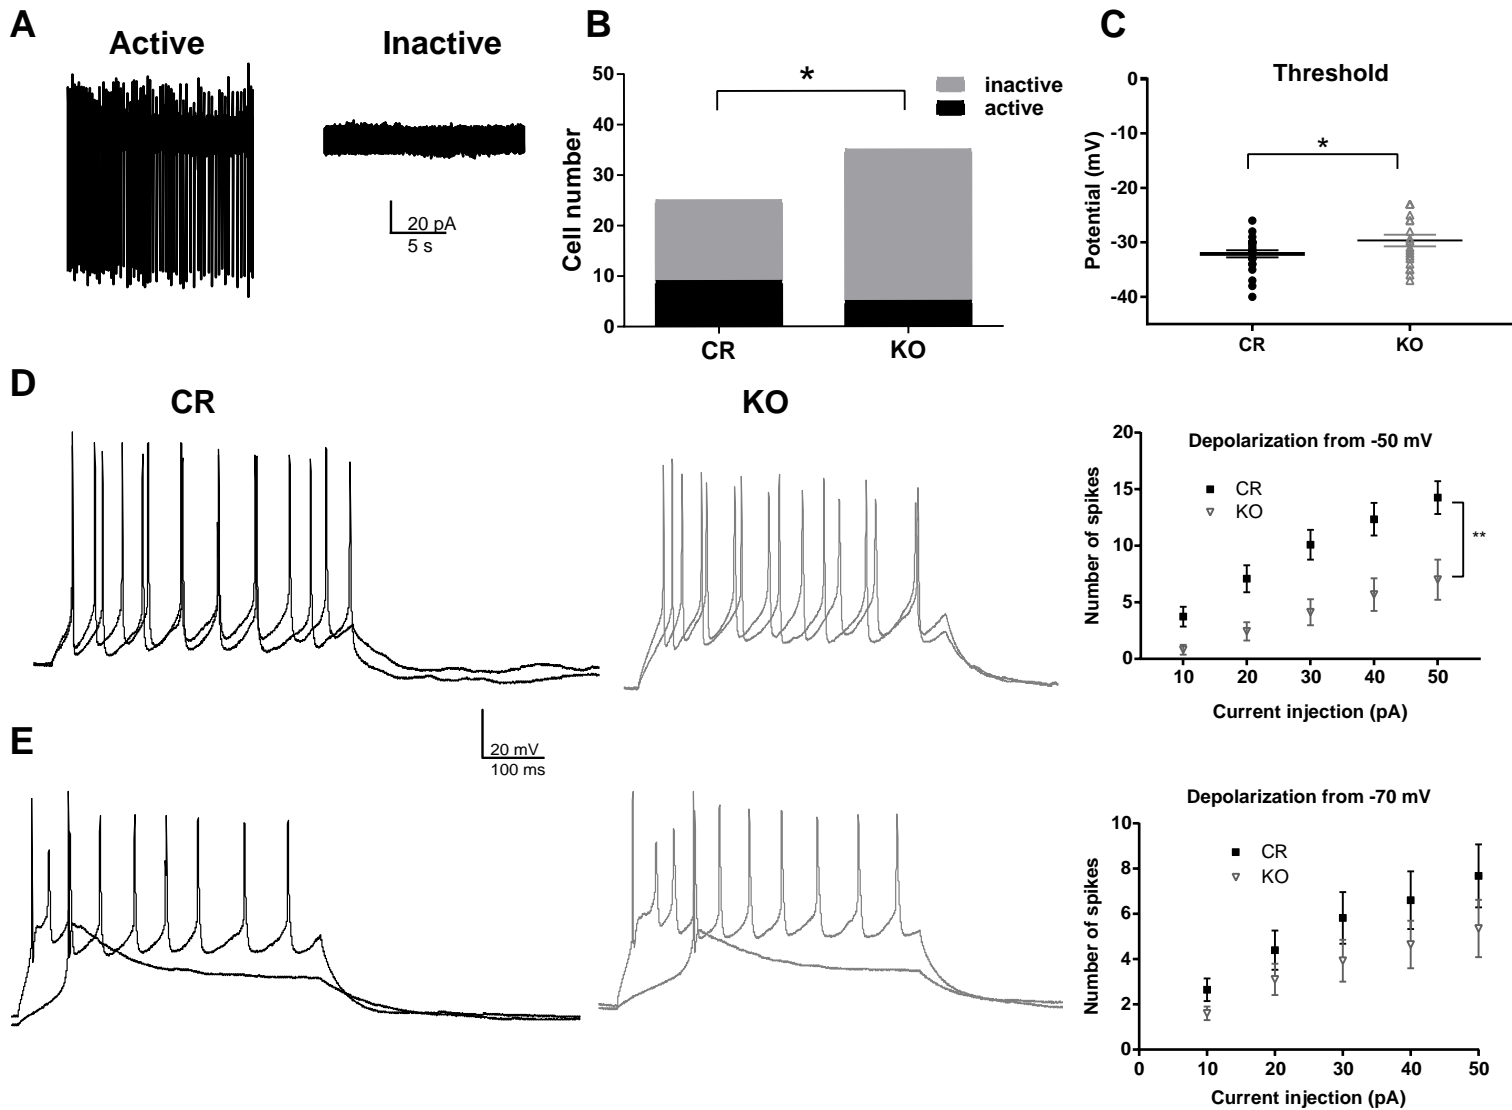

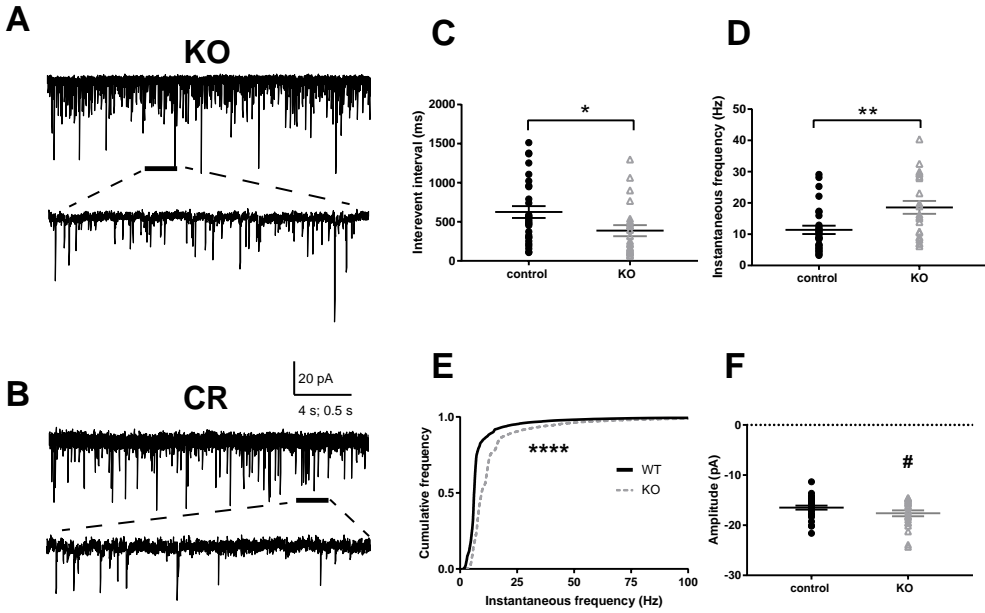

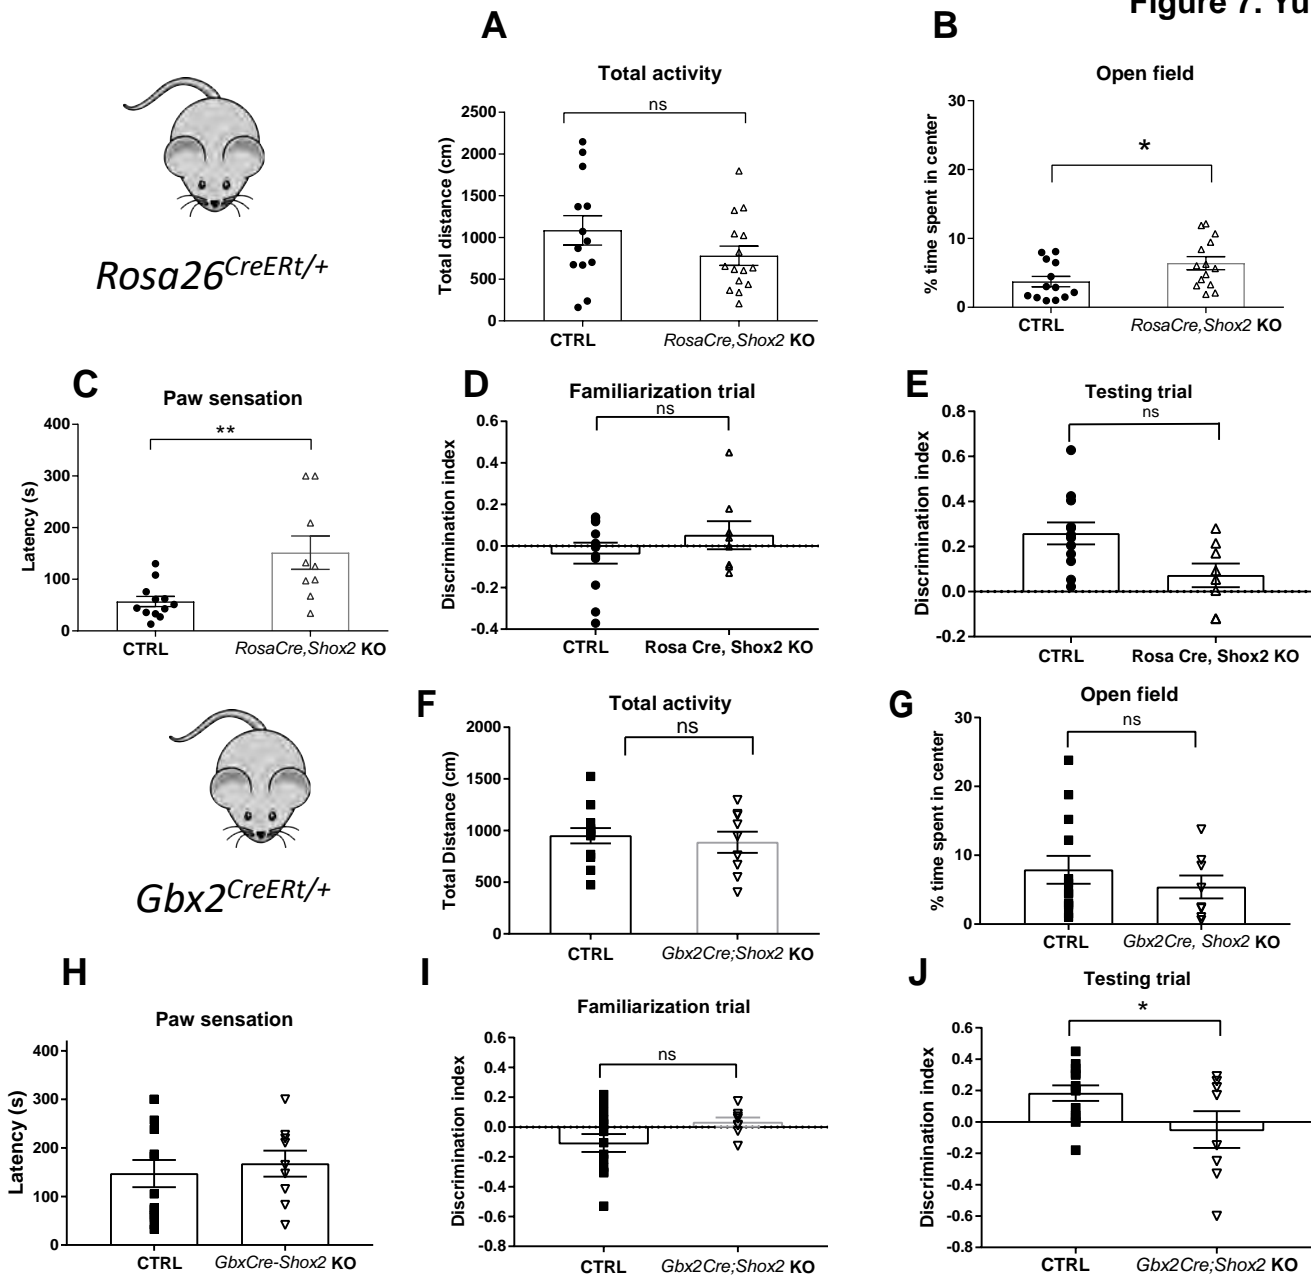

Source: https://www.biorxiv.org/content/10.1101/660662v2.full.pdf
